# Supplementary material for: Explainable Machine Learning diagnosis of Ozone Formation Sensitivity in China: Spatiotemporal Evolution and Driver Attribution
Source: Copernicus journal article supplement (doi:10.5194/egusphere-2025-5732), 2025-12-17
Supplement: Supplementary file [file egusphere-2025-5732-AC1-supplement.pdf]

## Responses to Reviewers' comments

To the esteemed Editor and Reviewers,

We sincerely thank the reviewer for the valuable comments and for the time spent reviewing the manuscript. We have tried our best to revise the manuscript according to the detailed suggestions and addressed each comment as carefully as possible. We believe these revisions improve the completeness and scientific rigor of the manuscript.

Please find the point-to-point responses to the reviewers' comments as follows:

Reviewers' comments are in black.

Author's responses are in blue color.

Changes in the manuscript are in red color.

Yours Sincerely,

Weihua Chen

On behalf of the authors

17 **Reviewer:1**

18 **Comments to the Author:**

19 1. This paper develops an explainable classification machine learning model with FNR-  
20 divided ozone photochemical regimes as a label to quantify the impact of meteorology  
21 and emissions on the ozone formation regimes (VOC-limited, NO<sub>x</sub>-limited, and  
22 transitional regimes). The authors provide a comprehensive assessment of the  
23 spatiotemporal evolution, seasonality, and the COVID-19 lockdown response of OFS  
24 over China, and reveal an apparent two-stage regime shift during 2005–2024. However,  
25 the core methodological logic is not fully convincing. Because the regimes are derived  
26 solely from the satellite HCHO/NO<sub>2</sub> ratio and a prescribed threshold, they do not  
27 explicitly encode meteorological effects. ML attribution therefore quantifies drivers of  
28 an FNR-based classification proxy rather than providing a physically grounded  
29 diagnosis of OFS. This disconnect weakens the manuscript's ability to address the key  
30 gap stated in the Introduction regarding meteorological impacts on OFS. Moreover,  
31 FNR thresholds are known to be region-dependent. Applying the uniform national  
32 thresholds potentially introduces non-negligible uncertainty, affecting OFS analysis.  
33 Therefore, the authors should clarify the conceptual rationale of this framework and  
34 demonstrate robustness to threshold/label uncertainty before it can be considered for  
35 publication.

36 **Response:** We sincerely thank the reviewer for this important and constructive  
37 comment. We agree that the original manuscript did not sufficiently distinguish between  
38 the satellite-based diagnosis of ozone (O<sub>3</sub>) formation sensitivity (OFS) and the

39 subsequent machine learning (ML) attribution analysis. In particular, the original  
40 presentation may have given the impression that the ML framework provides an  
41 independent physical diagnosis of OFS, whereas its actual role is to explain the  
42 statistical associations between FNR-derived OFS states and their meteorological and  
43 emission-related covariates. We have substantially revised the manuscript to clarify this  
44 conceptual boundary and to address the uncertainty associated with threshold-based  
45 regime classification.

46 1. We clarified the conceptual role of the framework.

47 In the revised manuscript, we explicitly state that OFS is diagnosed using the  
48 satellite HCHO/NO<sub>2</sub> ratio (FNR) together with prescribed threshold ranges, whereas  
49 the ML model is used only to attribute the relative importance of meteorological and  
50 emission-related factors associated with the occurrence and evolution of these FNR-  
51 derived OFS states. Therefore, the ML results are interpreted as statistical attribution  
52 rather than an independent physically based diagnosis or strict causal inference. This  
53 clarification has been incorporated throughout the manuscript, especially in **Section**  
54 **2.2.4** and **Section 3.4**.

55 2. We revised the manuscript wording to avoid overstating the role of machine  
56 learning.

57 To better reflect the actual scope of the study, we moderated several claims  
58 throughout the manuscript and revised the title to avoid implying that the ML model  
59 itself diagnoses OFS. The revised title is:

60 **Long-Term Ozone Formation Sensitivity in China: Spatiotemporal Evolution and**

61 **Machine Learning Attribution.**

62 We also expanded the discussion of limitations to emphasize the exploratory  
63 nature of the ML framework and the dependence of attribution results on threshold-  
64 defined OFS labels (**Section 4, Lines 637–645**).

65 3. We addressed the reviewer’s concern regarding threshold and its uncertainty.

66 We have clarified that the revised manuscript does not apply a uniform national  
67 FNR threshold. Instead, region-specific FNR threshold ranges were derived for  
68 different regions of China. In addition, we conducted new sensitivity analyses under  
69 multiple threshold scenarios to evaluate the robustness of OFS classification and its  
70 derived spatiotemporal patterns to threshold uncertainty. These revisions have been  
71 incorporated in **Section 2.2.1** and **Section 3.2**.

72

73 **Specific comments:**

74 2. Title and claimed contribution (OFS diagnosis vs ML attribution): The title is  
75 “Explainable Machine Learning diagnosis of Ozone Formation Sensitivity in China”,  
76 however, OFS is diagnosed using the FNR approach, while the machine learning  
77 component is primarily used for driver attribution. The title should therefore be revised  
78 to avoid misleading readers about the role of ML in OFS diagnosis. Relatedly, the  
79 statement in L39 (“Robust identification of OFS”) does not appear to be a contribution  
80 of this study. The main contribution is the attribution analysis, not the  
81 identification/diagnosis itself.

82 **Response:** We sincerely thank the reviewer for this careful and constructive

83 comment. We agree that the original title could give the impression that ML was used  
84 directly to diagnose OFS, whereas in this study OFS is primarily diagnosed using the  
85 satellite-based FNR, and the ML is mainly used to attribute the relative roles of  
86 meteorological and emission-related factors in the evolution of the FNR-derived OFS  
87 states. To avoid this potential misunderstanding, we have revised the title as follows:

88 **Long-Term Ozone Formation Sensitivity in China: Spatiotemporal Evolution and**  
89 **Machine Learning Attribution**

90 We have also revised the Introduction to more clearly distinguish the respective  
91 roles of FNR-based OFS classification and ML-based attribution of controlling factors.  
92 In particular, we no longer frame “robust identification of OFS” as a central  
93 contribution of this study. We have revised the text in Lines 42–43:

94 **Consequently, a reliable and regionally appropriate classification of OFS regimes,**  
95 **together with a clear attribution of their controlling factors, is essential for developing**  
96 **effective, region-specific multi-pollutant control strategies.**

97 We also appreciate the reviewer’s comment regarding the statement on “robust  
98 identification of OFS.” We agree that the main novelty of this study does not lie in  
99 proposing a completely new OFS diagnostic method. Instead, the methodological  
100 advance of this study is that, rather than directly adopting the widely used fixed  
101 threshold range of Duncan et al. (2010), we derived region-specific FNR threshold  
102 ranges for different regions in China based on satellite observations and surface O<sub>3</sub> data  
103 and then used these thresholds to classify OFS regimes. In this sense, the “robust  
104 identification” refers to improving the regional appropriateness and reliability of FNR-

105 based OFS classification in China, not to the development of a fundamentally new OFS  
106 diagnostic framework. We have clarified it in Lines 90–97:

107       Rather than proposing a fundamentally new OFS diagnostic framework, we derive  
108 region-specific FNR threshold ranges for different regions of China based on satellite  
109 observations and surface O<sub>3</sub> data and use these thresholds to classify OFS regimes. We  
110 further couple a Random Forest (RF) model with SHapley Additive exPlanations  
111 (SHAP) to statistically characterize how meteorological and emission-related factors  
112 are associated with the occurrence and long-term evolution of the FNR-derived OFS  
113 states. In this framework, OFS is diagnosed using the satellite-based FNR indicator,  
114 whereas the machine learning analysis is used for driver attribution rather than to  
115 diagnose OFS directly. This framework provides a more regionally appropriate basis  
116 for OFS classification in China and offers an interpretable perspective on the relative  
117 roles of emissions and meteorology in OFS evolution.

118

119 3. A major concern is the conceptual linkage between the FNR-based OFS diagnosis  
120 and the subsequent attribution to meteorology and emissions. The OFS derived from  
121 FNR is diagnosed purely from satellite-observed precursor ratios (HCHO/NO<sub>2</sub>) and  
122 does not explicitly account for meteorological influences. Yet later, the manuscript  
123 attributes this OFS to both meteorology and emissions. While the implementation and  
124 some results may appear plausible, the causal/diagnostic logic is unclear: OFS FNR is,  
125 by definition, only a function of two precursors plus a chosen threshold, so it is not  
126 obvious how this framework can address the stated problem in L70-71 or the key gap

127 raised in the Introduction (4<sup>th</sup> paragraph) regarding meteorological impacts on OFS.  
128 More broadly, OFS is already a relatively simple regime concept. The current ML  
129 framework appears to “complexify” it without a clear practical payoff. The authors  
130 should clarify the design rationale of this modeling/analysis framework and explicitly  
131 explain how it can diagnose meteorological impacts on OFS if the OFS metric itself is  
132 precursor-ratio-based.

133       Response: We sincerely thank the reviewer for this important and thoughtful  
134 comment. We agree that the conceptual linkage between the FNR-based OFS diagnosis  
135 and the subsequent attribution to meteorology and emissions needed to be clarified  
136 more explicitly in the original manuscript.

137       Our intention is not to suggest that meteorology is directly encoded in the FNR  
138 definition itself. Rather, OFS is first diagnosed using the satellite-based precursor ratio  
139 (HCHO/NO<sub>2</sub>), while the ML analysis is then used to examine which combinations of  
140 meteorological and emission-related conditions are statistically associated with the  
141 occurrence and transition of these FNR-derived OFS states. In this sense, the ML  
142 framework does not redefine OFS but instead treats the diagnosed OFS categories as  
143 integrated response states and statistically maps them to their potential controlling  
144 factors. We have now clarified this framework explicitly in Lines 90–97 of the revised  
145 manuscript:

146       Rather than proposing a fundamentally new OFS diagnostic framework, we derive  
147 region-specific FNR threshold ranges for different regions of China based on satellite  
148 observations and surface O<sub>3</sub> data and use these thresholds to classify OFS regimes. We

149 further couple a Random Forest (RF) model with SHapley Additive exPlanations  
150 (SHAP) to statistically characterize how meteorological and emission-related factors  
151 are associated with the occurrence and long-term evolution of the FNR-derived OFS  
152 states. In this framework, OFS is diagnosed using the satellite-based FNR indicator,  
153 whereas the machine learning analysis is used for driver attribution rather than to  
154 diagnose OFS directly. This framework provides a more regionally appropriate basis  
155 for OFS classification in China and offers an interpretable perspective on the relative  
156 roles of emissions and meteorology in OFS evolution.

157 More specifically, although OFS is defined based on precursor ratios, the  
158 spatiotemporal distribution of those ratios is itself influenced by both emissions and  
159 meteorological conditions. Meteorological factors can affect precursor emissions,  
160 chemical transformation, transport, dilution, and boundary-layer mixing, thereby  
161 indirectly modulating the probability of different OFS states (Jin et al., 2013; Vazquez  
162 Santiago et al., 2024). We have therefore revised the manuscript to state clearly that  
163 meteorological factors affect OFS indirectly—not through the FNR definition itself, but  
164 by modulating the occurrence probabilities of different OFS states. We also now  
165 explicitly note that the attribution results should be interpreted as statistical associations  
166 rather than strict causal relationships in Lines 229–234 of the revised manuscript:

167 It should be noted that, although OFS is diagnosed here using the FNR indicator,  
168 the spatiotemporal distribution of FNR-derived OFS states is jointly shaped by  
169 precursor emissions, chemical transformation, transport, dilution, and boundary-layer  
170 mixing (Kleinman et al., 2005; Liu and Shi, 2021). Meteorological conditions therefore

171 do not enter the OFS definition directly but can influence the probability of different  
172 OFS states by modulating the underlying precursor environment. Based on this  
173 rationale, we treat the diagnosed OFS regimes as response classes and use RF to  
174 statistically map their relationships with meteorological and emission-related predictors.

175 In addition, to address the reviewer’s concern about the practical value of the  
176 framework, we have clarified that the purpose of the ML analysis is not to “complexify”  
177 OFS, but to provide a decomposable and interpretable attribution framework for  
178 understanding the long-term evolution and regional heterogeneity of OFS across China,  
179 especially under changing emission backgrounds and meteorological variability. This  
180 has also been emphasized in Lines 622–630 of the revised manuscript:

181 Although the definition of OFS is based on the relative proportions of precursors,  
182 its spatiotemporal patterns actually reflect the combined effects of emission sources and  
183 meteorological conditions. Therefore, we treat OFS types as integrated response states  
184 and apply ML techniques to statistically model their relationships with meteorological  
185 parameters and emission variables. Within this framework, meteorological factors  
186 indirectly influence the formation of OFS by modulating the probabilities of different  
187 OFS states, rather than directly altering the FNR definition itself. Our focus is on the  
188 FNR-derived OFS, rather than absolute O<sub>3</sub> concentrations, enabling us to elucidate how  
189 meteorology governs the classification and evolution of sensitivity regimes. It should  
190 be noted that the attribution analysis presented here is based on statistical associations,  
191 and the results only reflect the relative contributions of each variable to OFS states,  
192 without implying strict causal relationships.

193       And Lines 651–655:

194       Overall, the satellite–indicator (FNR)–interpretable machine learning (RF +  
195 SHAP) framework developed here provides a scalable and decomposable framework  
196 for interpreting the long-term evolution and associated factors influencing FNR-derived  
197 OFS states from national to urban-cluster scales. This framework offers a useful  
198 scientific basis for dynamic sensitivity reclassification and the design of region-specific  
199 NO<sub>x</sub>–VOC control strategies, with broader relevance for O<sub>3</sub> mitigation in other  
200 megacity regions.

201       Finally, we have added a clearer discussion of the limitations of this framework,  
202 including that this is an exploratory application of a classification model to OFS states,  
203 and that the attribution analysis is intended to complement, rather than replace, process-  
204 based chemical diagnosis. We have revised the expression in Lines 637–645 of the  
205 revised manuscript:

206       This study is subject to several uncertainties and limitations. First, this is an  
207 exploratory application of a classification model to OFS states, and the performance of  
208 the RF depends on class balance; however, the threshold-based classification leads to  
209 class imbalance, and some influencing factors are not included. Second, the thresholds  
210 themselves are uncertain, and the coarse spatial resolution of OMI data, along with  
211 mismatches with ground observations, may introduce classification uncertainty and  
212 affect model performance. The use of higher-resolution data such as TROPOMI,  
213 combined with O<sub>3</sub> observations, can improve diagnostic accuracy (Ren et al., 2022).  
214 Future work integrating ML with observations and chemical transport models may help

215 bridge this gap (Xiong et al., 2024). Therefore, the present framework should be viewed  
216 as a complementary statistical attribution tool, rather than a substitute for process-based  
217 OFS diagnosis using chemical transport models or observation-based box models.

218

219 4. Use of a fixed national FNR threshold and resulting uncertainty: The authors use a  
220 single fixed FNR threshold (1 and 2) to classify ozone formation regimes across China.  
221 However, previous studies suggest that the appropriate FNR thresholds are higher in  
222 several major Chinese megacities than in other regions. Applying a non-local (uniform)  
223 threshold can bias regime classification and may artificially reduce inferred O<sub>3</sub>  
224 sensitivity to VOCs, especially at the national scale (Ren et al., ACP, 2022,  
225 <https://doi.org/10.5194/acp-22-15035-2022>). This threshold-related uncertainty is non-  
226 negligible. I recommend estimating region-specific thresholds by connecting satellite  
227 HCHO/NO<sub>2</sub> to ground-based O<sub>3</sub> responses (e.g., using observed O<sub>3</sub>-precursor  
228 relationships) and then reassessing the regime classification and subsequent analyses.

229 Response: We sincerely thank the reviewer for this important and constructive  
230 comment. We fully agree that the use of a uniform national FNR threshold may  
231 introduce substantial uncertainty into OFS classification, especially in China where  
232 precursor emissions, atmospheric environments, and meteorological conditions vary  
233 markedly across regions. In response to this comment, we have made a major revision  
234 to the manuscript by removing the original fixed threshold approach based on Duncan  
235 et al. (2010) and instead deriving region-specific FNR threshold ranges for different  
236 regions of China by linking satellite-derived HCHO/NO<sub>2</sub> ratios with ground-based

237 ozone (O<sub>3</sub>) observations.

238 Specifically, following Jin et al. (2020) and related studies, we established the  
239 relationship between FNR and the probability of high O<sub>3</sub> occurrence and used this  
240 relationship to derive threshold ranges separately for the five major urban clusters (BTH,  
241 FWP, YRD, SCB, and PRD) and for other regions of China (ORC). The revised results  
242 show clear regional heterogeneity in the thresholds derived. We have revised the  
243 relevant methodology in Lines 160–184:

244 OFS regimes were then identified according to the corresponding FNR threshold  
245 ranges. The threshold ranges were determined mainly following the method of Jin et al.  
246 (2020). In this study, region-specific FNR thresholds across China were derived by  
247 combining OMI satellite observations with surface O<sub>3</sub> measurements. This approach is  
248 also consistent with previous studies that derived threshold ranges from fitted O<sub>3</sub>–FNR  
249 relationships (Wang et al., 2021; Ren et al., 2022; Chen et al., 2024). In practice, the  
250 transition of OFS from VOC-limited to NO<sub>x</sub>-limited regimes is gradual rather than  
251 abrupt. This transition can be influenced by multiple factors, including topography,  
252 meteorological conditions, and the spatial resolution of satellite observations (Jin et al.,  
253 2020). Because these influencing factors vary across China, the corresponding FNR  
254 threshold ranges are also expected to differ among regions. For this reason, OFS  
255 regimes were identified using region-specific FNR threshold ranges. China was divided  
256 into six regions, including five major urban clusters with severe O<sub>3</sub> pollution, namely  
257 BTH, FWP, YRD, SCB, and PRD, and one additional category comprising all  
258 remaining areas, referred to as other regions of China (ORC) (Lu et al., 2018). These

259 six regions were used as the basic units for deriving region-specific FNR threshold  
260 ranges, which were then applied to identify OFS regimes in each region.

261 Because O<sub>3</sub> pollution in China occurs mainly during the warm season (April–  
262 September) (Lu et al., 2020b), the analysis was restricted to April–September in 2015–  
263 2023. To match the OMI overpass time, surface O<sub>3</sub> concentrations at 13:00 and 14:00  
264 local time were averaged for each site and day. The resulting daily O<sub>3</sub> concentrations  
265 were then collocated with OMI FNR values at the corresponding grid cells. For each  
266 site, the high-O<sub>3</sub> probability was then defined as the fraction of days during the study  
267 period on which the 13:00–14:00 mean O<sub>3</sub> concentration exceeded 160 μg m<sup>-3</sup>. The  
268 resulting paired samples were subsequently pooled within each region for threshold  
269 derivation.

270 To focus on polluted conditions, samples with NO<sub>2</sub> vertical column densities  
271 below  $1.5 \times 10^{15}$  molec cm<sup>-2</sup> were excluded, following previous studies (Jin et al., 2020;  
272 Wang et al., 2021). In addition, high-end outliers (5% or 10%, depending on the region)  
273 were removed prior to fitting to reduce the influence of extreme values (Chen et al.,  
274 2024). After quality control, paired high-O<sub>3</sub> probability and FNR samples in each region  
275 were grouped into 100 bins according to FNR and a cubic polynomial was fitted to the  
276 binned relationship between high-O<sub>3</sub> probability and FNR. The FNR interval  
277 corresponding to fitted high-O<sub>3</sub> probability values above the 90<sup>th</sup> percentile was then  
278 defined as the threshold range for that region (Jin et al., 2020).

279 [And the revised results are presented in Lines 333–351:](#)

### 280 **3.2 Determination of region-specific FNR threshold ranges**

281 To derive region-specific FNR threshold ranges, we first examined the nonlinear  
282 relationship between O<sub>3</sub> formation and its precursors using satellite-derived HCHO and  
283 NO<sub>2</sub>. Figure S3 shows the distribution of high-O<sub>3</sub> probability in the two-dimensional  
284 HCHO–NO<sub>2</sub> space for the six regions. The overall pattern is similar to the O<sub>3</sub> contour  
285 structure reported in previous studies (Sillman et al., 1999), indicating that HCHO and  
286 NO<sub>2</sub> can reasonably serve as proxies for VOCs and NO<sub>x</sub>, respectively, in characterizing  
287 the nonlinear response of O<sub>3</sub> formation. Based on this relationship, each region can be  
288 broadly divided into three OFS regimes: a NO<sub>x</sub>-limited regime under relatively high  
289 HCHO and low NO<sub>2</sub> conditions, a transitional regime under relatively high levels of  
290 both HCHO and NO<sub>2</sub>, and a VOC-limited regime under relatively low HCHO and high  
291 NO<sub>2</sub> conditions.

292 Based on the fitted high-O<sub>3</sub> probability-FNR relationships, region-specific  
293 threshold ranges were derived for the six regions, reflecting the gradual transition  
294 among OFS regimes. Figure 3 shows the fitted relationships for the six regions during  
295 the warm season (April–September) of 2015–2023. Clear regional differences are found  
296 in the derived FNR threshold ranges. Among the six regions, FWP shows the highest  
297 threshold range, with a central threshold of 3.42 and a range of [2.26, 4.77], whereas  
298 YRD shows the lowest, with a central threshold of 1.59 and a range of [0.90, 2.37]. The  
299 corresponding threshold ranges for BTH, SCB, PRD, and ORC are [1.51, 3.30], [1.93,  
300 4.73], [1.66, 3.70], and [1.17, 3.08], respectively. In terms of fitting performance, the  
301 correlation coefficient is 0.58 in FWP and exceeds 0.60 in the other regions, reaching  
302 0.96 in ORC, with all p-values below 0.05. These results indicated that the fitted curves

303 generally capture the variation in high-O<sub>3</sub> probability well. Comparison with previous  
 304 studies (Table. S1) further shows that FNR thresholds vary across regions, reflecting  
 305 differences in atmospheric environment, precursor emissions, and local conditions (Liu  
 306 and Shi, 2021).

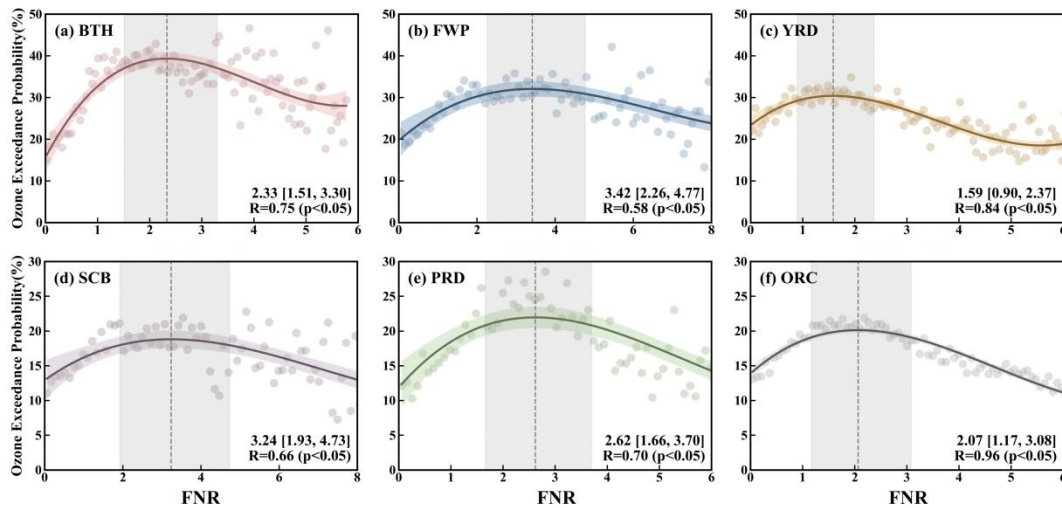

307  
 308 **Figure 3. Relationship between daily high-O<sub>3</sub> probability and FNR in the six regions during the warm**  
 309 **season (April–September) of 2015–2023. Solid lines show the fitted cubic polynomial curves, and the shaded**  
 310 **areas indicate the 95% confidence intervals. Vertical dashed lines mark the peak values of the fitted curves,**  
 311 **while the gray shaded bands denote the FNR ranges corresponding to the upper 10% of the fitted curves,**  
 312 **which were used to define the threshold ranges.**

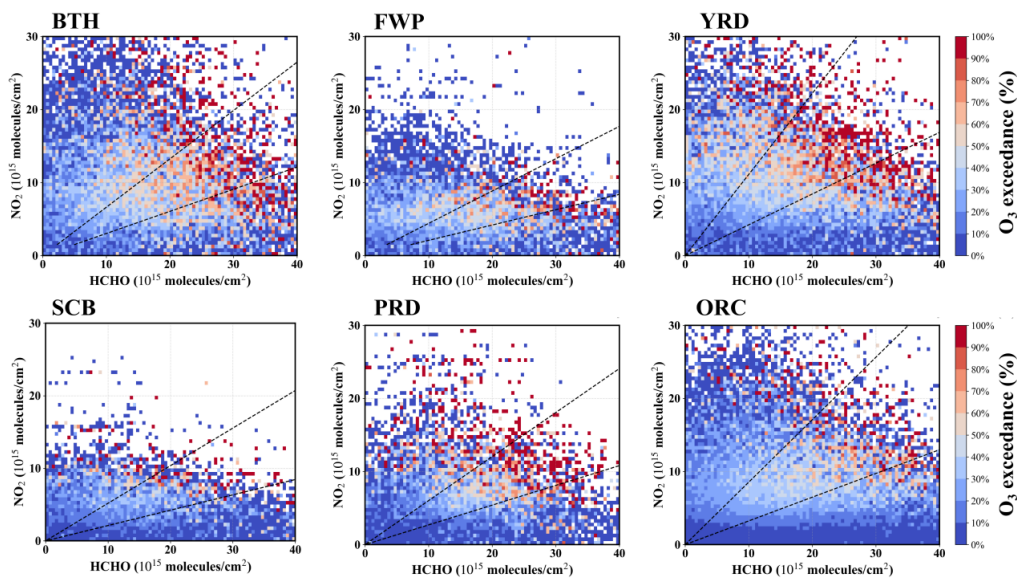

313  
 314 **Figure S3. O<sub>3</sub> exceedance probability as a function of OMI HCHO and NO<sub>2</sub> for the six regions during the**  
 315 **warm season (April–September) from 2015 to 2023. The black dashed lines indicate the OMI HCHO/NO<sub>2</sub>**  
 316 **values corresponding to the derived FNR threshold ranges used to classify NO<sub>x</sub>-limited, transitional, and**

**VOC-limited regimes.**

317

318 In addition, to directly address the reviewer's concern regarding threshold-related  
319 uncertainty, we further added a threshold-sensitivity analysis in the revised manuscript.  
320 Three threshold scenarios were designed: the region-specific thresholds derived in this  
321 study, literature-based minimum–maximum ranges, and literature-based average ranges.  
322 The results show that OFS classification is indeed sensitive to threshold choice, and the  
323 magnitude of this sensitivity varies substantially across regions. This confirms that  
324 threshold uncertainty is non-negligible and that applying literature-based or spatially  
325 uniform thresholds without regional constraints may introduce considerable bias into  
326 OFS classification. We have added more information in Lines 352–375:

327 Given these pronounced regional differences, we further assessed how threshold  
328 uncertainty affects OFS classification. Three threshold-range scenarios were designed.  
329 Specifically, Scenario 1 (S1) used the threshold ranges derived in this study for the  
330 warm season of 2015–2023, Scenario 2 (S2) adopted the minimum–maximum  
331 threshold ranges reported in previous studies, and Scenario 3 (S3) used threshold ranges  
332 calculated from the average of the corresponding maximum and minimum values. The  
333 threshold ranges for the six regions under S1-S3 scenarios are listed in Table S1. These  
334 three scenarios were then used to evaluate the sensitivity of OFS classification to  
335 different FNR threshold selections in the five major city clusters during the warm  
336 season over 2005–2023 (Fig. S4).

337 The results show that OFS classification is strongly affected by threshold choice,  
338 although the magnitude of this effect varies markedly across regions. Among the five

339 regions, FWP shows the largest sensitivity to threshold variation, with changes ranging  
340 from  $-53.8\%$  to  $51.6\%$  and an average value of about  $22.0\%$ . SCB also exhibits  
341 substantial sensitivity, with corresponding changes of  $-48.8\%$  to  $52.0\%$ . In contrast,  
342 PRD is relatively less sensitive, with changes ranging from  $-36.3\%$  to  $21.1\%$  and an  
343 average value of about  $17.0\%$ . BTH and YRD show intermediate responses, with  
344 ranges of  $-31.0\%$  to  $37.2\%$  and  $-31.5\%$  to  $31.5\%$ , respectively. These results indicate  
345 that the uncertainty introduced by threshold selection is not spatially uniform but  
346 depends on regional photochemical characteristics and the width of the transitional  
347 range.

348 Figure S4 further shows that the influence of threshold choice is often asymmetric,  
349 with some scenarios producing much larger positive or negative deviations than others.  
350 This indicates that OFS classification does not respond linearly to threshold  
351 perturbations. In particular, threshold ranges compiled from previous studies can  
352 produce substantial departures from the classification results obtained using the region-  
353 specific thresholds derived here. Even the average-threshold scenario still leads to  
354 noticeable deviations in several regions. These findings suggest that threshold  
355 transferability across regions is limited and that applying literature-based thresholds  
356 without regional constraints may introduce considerable bias into OFS diagnosis.

357 Overall, these results demonstrate that uncertainty in FNR thresholds can  
358 substantially alter the estimated proportions of different OFS regimes. Region-specific  
359 thresholds derived from regional observational relationships therefore provide a more  
360 robust basis for OFS classification than fixed or literature-averaged thresholds.

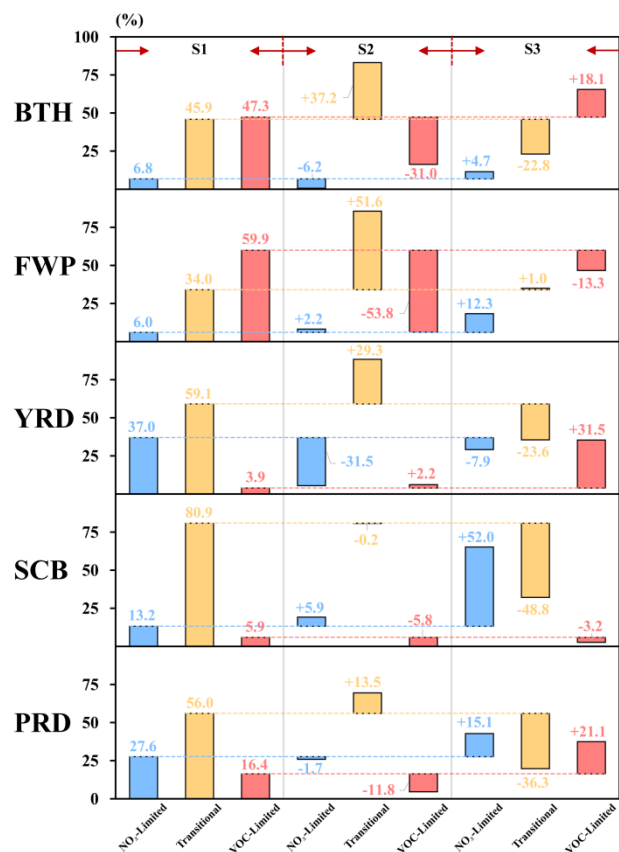

361

362 **Figure S4. Sensitivity of OFS regime area fractions to different FNR threshold scenarios in the five major**  
 363 **city clusters during the warm season (April–September) over 2005–2023. S1 denotes the region-specific**  
 364 **thresholds derived in this study, S2 denotes the minimum–maximum threshold ranges compiled from**  
 365 **previous studies, and S3 denotes the averaged threshold ranges based on the corresponding minimum and**  
 366 **maximum values. Bars represent deviations in regime area fractions under S2 and S3 relative to S1.**

367

368 5. In L21, “non-methane volatile organic compounds” appears only once in the abstract;  
 369 the abbreviation is unnecessary and can be removed.

370 **Response: We thank the reviewer for this careful comment. We agree that the**  
 371 **original expression was unnecessary in this context. Since the abstract refers to VOCs**  
 372 **in a general sense rather than specifically to non-methane VOCs throughout the**  
 373 **manuscript, we have revised “non-methane volatile organic compounds” to “volatile**  
 374 **organic compounds (VOCs)” in the Abstract (Line 16).**

375

376 6. In L79, please specify the criteria used to define the “five ozone-prone urban clusters”  
377 and provide justification for this particular regional delineation (why these clusters).

378       Response: We thank the reviewer for this helpful comment. The five urban clusters  
379 were selected because they are the most consistently O<sub>3</sub>-polluted and frequently  
380 reported O<sub>3</sub> hotspot regions in China. This regional delineation was based on two main  
381 considerations. First, according to recent national assessments, these clusters have  
382 persistently elevated surface O<sub>3</sub> concentrations and are among the most severely  
383 affected regions in China in terms of O<sub>3</sub> pollution (Ozone Pollution Control Committee  
384 of Chinese Society of Environmental Sciences, 2024). Second, they have also been  
385 widely identified in previous studies as key regions for O<sub>3</sub> formation and control, owing  
386 to their high anthropogenic emissions, dense population, and strong contrasts in  
387 meteorological and topographic conditions (Wang et al., 2017; Zhang et al., 2025).  
388 Focusing on these five clusters therefore allows us to capture the main regional  
389 heterogeneity of OFS in China while maintaining consistency with previous O<sub>3</sub> studies  
390 and national air-pollution assessments.

391       To clarify this point, we have added the relevant explanation in the revised  
392 manuscript (Lines 103–107) as follows:

393       These regions were selected because they have persistently high O<sub>3</sub> levels and are  
394 widely recognized as major O<sub>3</sub> pollution hotspots in China (Ozone Pollution Control  
395 Committee of Chinese Society of Environmental Sciences, 2024). They also represent  
396 distinct combinations of emission characteristics, meteorological conditions, and  
397 topographic settings, making them suitable for examining the regional heterogeneity of

398 OFS (Wang et al., 2017; Zhang et al., 2025b).

399

400 7. In L97, the threshold defining “anomalously large HCHO columns” ( $> 1.0 \times 10^{17}$   
401 molec cm<sup>-2</sup>) should be justified. Even if this follows prior work, the manuscript should  
402 briefly explain the reasoning/physical basis for this cutoff.

403 Response: We sincerely thank the reviewer for this helpful comment. We agree  
404 that the upper threshold used to identify anomalously large HCHO columns should be  
405 more clearly justified in the manuscript.

406 In the revised manuscript, we have clarified that the cutoff of  $1.0 \times 10^{17}$  molec  
407 cm<sup>-2</sup> was not arbitrarily chosen but follows the quality-control approach adopted in  
408 previous studies using the OMI HCHO product, particularly Zhu et al. (2017). This  
409 threshold is intended to exclude unrealistic extreme values and retrieval outliers that  
410 are far above the typical range of OMI-retrieved tropospheric HCHO columns. As now  
411 stated in the manuscript, the OMI HCHO columns retrieved with the Smithsonian  
412 Astrophysical Observatory (SAO) algorithm generally fall within the range of  $4 \times 10^{15}$   
413 to  $4 \times 10^{16}$  molec cm<sup>-2</sup>, with a detection limit of approximately  $1.0 \times 10^{16}$  molec cm<sup>-2</sup>  
414 (González Abad et al., 2015). Therefore, values exceeding  $1.0 \times 10^{17}$  molec cm<sup>-2</sup> are  
415 substantially above the normal observational range and are treated as anomalous  
416 retrievals rather than physically representative HCHO columns.

417 We have accordingly revised the relevant text in the manuscript to make this  
418 rationale explicit and to show that this screening step is a data-quality control measure  
419 based on both the retrieval characteristics of the OMI product and prior literature, rather

420 than an arbitrary threshold choice (Lines 123–129):

421 HCHO data were obtained from the Level-3 OMHCHOd product with a spatial  
422 resolution of  $0.1^\circ \times 0.1^\circ$  (Chance, 2019). This product is generated based on the Level-  
423 2 OMHCHO retrievals after applying quality control filters to exclude pixels with cloud  
424 fractions  $> 0.3$ , solar zenith angles  $> 70^\circ$ , or those affected by the OMI row anomaly.  
425 The HCHO columns were retrieved using the Smithsonian Astrophysical Observatory  
426 (SAO) algorithm, with typical values ranging from  $4 \times 10^{15}$  to  $4 \times 10^{16}$  molec  $\text{cm}^{-2}$  and  
427 with a detection limit of approximately  $1.0 \times 10^{16}$  molec  $\text{cm}^{-2}$  (González Abad et al.,  
428 2015). Following Zhu et al. (2017), only values between  $-0.5 \times 10^{16}$  and  $1.0 \times 10^{17}$   
429 molec  $\text{cm}^{-2}$  were retained, while values outside this range were treated as outliers and  
430 removed.

431

432 8. L154: For model evaluation, I suggest training the model using 2005-2020 data and  
433 performing an independent validation using 2021-2023. This split would more  
434 accurately demonstrate model generalization.

435 Response: We sincerely thank the reviewer for this valuable suggestion. We agree  
436 that a training-validation split of 2005–2020 for training and 2021–2023 for  
437 independent validation is a rigorous strategy for evaluating temporal generalization,  
438 especially in prediction-oriented studies.

439 However, the primary objective of this study is not to predict OFS in future years,  
440 but to systematically investigate the statistical relationships between OFS regimes and  
441 their associated environmental drivers over the full observational period (2005–2023),

442 and to further conduct an explainable machine learning analysis.

443        Within this framework, the SHAP method is used to decompose model predictions  
444 into interpretable feature attributions, which can be consistently compared across  
445 different samples and temporal subsets (Lundberg and Lee, 2017). Therefore, adopting  
446 a strict temporal hold-out strategy (e.g., training the model on 2005–2020 and  
447 independently validating it on 2021–2023) would result in the model being interpreted  
448 only under a late-period distribution, thereby limiting SHAP-based explanations from  
449 fully covering key stages such as policy implementation periods. This would  
450 consequently restrict a comprehensive characterization of regime changes across the  
451 entire study period.

452        To address this, a stratified random sampling strategy was adopted, in which  
453 samples were split into 80% for training and 20% for testing (Özüpak et al., 2025). To  
454 ensure that both the training and testing sets include samples from all years, a year-wise  
455 stratification procedure was further implemented. This design maintains overall  
456 distributional consistency while preserving interannual variability associated with key  
457 periods such as policy interventions and the COVID-19 pandemic, enabling the model  
458 to learn more representative overall distribution patterns. In addition, SHAP, when  
459 applied to a fixed trained model, can be used to compare feature attributions across  
460 different temporal subsets (e.g., Zhang et al., 2024). Therefore, this sampling strategy  
461 is also designed to support subsequent SHAP-based cross-temporal interpretation and  
462 comparisons between different stages, including pre- and post-policy periods.

463        Furthermore, given the presence of class imbalance in the dataset, a strict temporal

464 hold-out split may lead to an unbalanced class distribution in the validation set, thereby  
465 introducing potential sampling bias and compromising the reliability of model  
466 evaluation. Therefore, stratified sampling helps preserve the intrinsic structural  
467 characteristics of the original dataset while ensuring a more balanced representation of  
468 majority and minority classes (Sadaiyandi et al., 2023).

469 To address the reviewer's concern, we have clarified in the revised manuscript the  
470 present study focuses on cross-temporal mechanistic interpretation and feature  
471 attribution analysis.

472 We have provided a more detailed explanation of this in Lines 235–248 of the  
473 revised manuscript:

474 Model training and evaluation were based on annual mean gridded data for the  
475 warm seasons (April–September) from 2005 to 2023. Because the primary aim of this  
476 study was not to predict OFS in future years, but to characterize the relationships  
477 between OFS regimes and their environmental drivers over the full study period, a year-  
478 wise stratified random sampling strategy was adopted. In studies aimed at predicting  
479 future years, a common practice is to train the model on earlier-period data and validate  
480 it on later-period data in order to assess temporal extrapolation skill (Zhu et al., 2019;  
481 Wang et al., 2023). Such a strategy was not adopted here because it would bias model  
482 evaluation and subsequent SHAP interpretation toward the late-period data distribution.  
483 Instead, samples from each year were randomly divided into 80% for training and 20%  
484 for validation (Özüpak et al., 2025), so that both subsets contained data from all years.  
485 This design preserves interannual variability associated with key periods, including

486 major policy interventions and the COVID-19 pandemic, while maintaining  
487 comparable sample distributions across the training and validation sets. In addition,  
488 given the class imbalance in the dataset, this stratified sampling strategy helps maintain  
489 a more balanced class distribution in both subsets, thereby improving the reliability of  
490 model evaluation (Sadaiyandi et al., 2023). It also provides a more suitable basis for  
491 subsequent SHAP-based interpretation across different temporal subsets, thereby  
492 facilitating comparisons of OFS regimes before and after policy implementation.

493

494 9. In the Results, the unit formatting “molec.cm<sup>-2</sup>” is unusual. Please revise to a  
495 standard format with a space, e.g., “molec cm<sup>-2</sup>” consistently throughout.

496 Response: Following the reviewer’s suggestion, we have revised the unit  
497 formatting throughout the manuscript and standardized all NO<sub>2</sub> and HCHO column  
498 densities to “molec cm<sup>-2</sup>”.

499

500 10. In L212, the FNR trend over the Sichuan Basin (SCB) does not appear statistically  
501 significant; describing it as “a modest upward trend” seems inaccurate. It would be  
502 more appropriate to state that no significant trend is observed. Additionally, SCB does  
503 not seem to be analyzed with the same two-stage trend framework used elsewhere.  
504 Visual inspection suggests a decrease during ~2005-2011 and an increase during ~2013-  
505 2023, with 2012 resembling an outlier/break point. The authors should justify the  
506 staging choice for SCB and apply a consistent approach. Finally, since SCB is discussed  
507 first in the text, it would be clearer to label it as panel (a) rather than panel (d).

508           Response: We sincerely thank the reviewer for this careful and constructive  
509 comment. We agree that our original wording was not sufficiently precise for SCB. In  
510 the revised manuscript, we have replaced “a modest upward trend” with “no significant  
511 overall trend”, which is more consistent with the statistical result for SCB.

512           Regarding the staging issue, we appreciate the reviewer’s suggestion and have now  
513 clarified the analytical basis more explicitly. In the revised manuscript, we first applied  
514 the Pettitt test to all five regions using a consistent procedure to identify possible change  
515 points in the FNR time series. The results show that the regions do not follow a fully  
516 uniform pattern. In particular, SCB and PRD differ from BTH, FWP, and YRD, which  
517 show clearer phase-like transitions around the policy period. For SCB, the Pettitt test  
518 does not indicate a statistically significant change point, and its overall FNR trend is  
519 also not significant. Therefore, although visual inspection may suggest some fluctuation  
520 around 2012, we do not consider it appropriate to interpret SCB using the same two-  
521 stage framework applied to regions with clearer and statistically supported phase shifts.  
522 Instead, we now describe SCB as showing no significant long-term trend, with OFS  
523 remaining largely within the transitional regime. We have clarified it in Lines 396–400:

524           In contrast, SCB shows a relatively high annual mean FNR of 3.34 but no  
525 significant change point or clear long-term trend. In addition, SCB did not show a  
526 statistically significant change point in the Pettitt test, which further supports the  
527 decision not to interpret its FNR evolution using the same two-stage framework.  
528 Together with the relatively small changes in both NO<sub>2</sub> and HCHO, this suggests that  
529 the precursor structure in SCB remained comparatively stable over the study period,

530 and OFS stayed largely within the transitional regime.

531 For PRD, the Pettitt test and long-term trend analysis indicate yet another pattern.  
532 Unlike SCB, PRD exhibits a significant long-term increase in FNR, but its evolution is  
533 not best described as the same two-stage behavior seen in BTH, FWP, and YRD. We  
534 therefore treat PRD separately in the revised text and clarify that it represents a distinct  
535 regional evolution pattern rather than being grouped into the common two-stage  
536 framework. We have clarified it in Lines 401–404:

537 PRD differs from the other two patterns by exhibiting a significant long-term  
538 increase in FNR, at a rate of 0.06 per year ( $p < 0.05$ ). This trend indicates a shift in OFS  
539 from VOC-limited or transitional regimes toward more NO<sub>x</sub>-limited regimes, likely  
540 associated with reductions in NO<sub>x</sub>-rich sources in the region, particularly from road  
541 traffic and industrial emissions, as suggested by previous studies (Bian et al., 2019; Li  
542 et al., 2025).

543 Accordingly, the revised manuscript now applies to a consistent initial change-  
544 point detection method across regions, while allowing for region-specific interpretation  
545 when the statistical characteristics differ. This revision avoids implying that all five  
546 regions follow the same two-stage evolution and provides a more accurate  
547 interpretation of SCB and PRD.

548 With respect to the figure presentation, we have adjusted the order of discussion  
549 in the text to better align with the order shown in the figure, which we believe improves  
550 readability without requiring changes to the panel labels in the formatted multi-panel  
551 figure.

552

553 11. In L216, the statement “driven primarily by substantial NO<sub>x</sub> reductions from road  
554 traffic and industrial sources” appears to lack direct supporting evidence in the  
555 manuscript (data or references).

556 Response: We agree that the original wording was too strong, as the manuscript  
557 did not provide direct evidence within the main text to support such a specific source  
558 attribution. In the revised manuscript, we have therefore moderated the expression and  
559 added supporting references to make the interpretation better grounded.

560 Specifically, instead of stating that the change was “driven primarily by substantial  
561 NO<sub>x</sub> reductions from road traffic and industrial sources,” we now describe it more  
562 cautiously as likely associated with reductions in NO<sub>x</sub>-rich sources in the region,  
563 particularly from road traffic and industrial emissions, as suggested by previous studies.  
564 We have revised it in Lines 401–404:

565 PRD differs from the other two patterns by exhibiting a significant long-term  
566 increase in FNR, at a rate of 0.06 per year ( $p < 0.05$ ). This trend indicates a shift in OFS  
567 from VOC-limited or transitional regimes toward more NO<sub>x</sub>-limited regimes, likely  
568 associated with reductions in NO<sub>x</sub>-rich sources in the region, particularly from road  
569 traffic and industrial emissions, as suggested by previous studies (Bian et al., 2019; Li  
570 et al., 2025).

571

572 12. Given the threshold uncertainty raised in Comment #3, the conclusions in Section  
573 3.2 should be treated as provisional. A reanalysis after adopting region-specific (or  
574 otherwise justified) thresholds is necessary to confirm the robustness of the reported

575 regime shifts.

576         Response: We sincerely thank the reviewer for this important comment. We fully  
577 agree that the conclusions regarding OFS regime shifts should not rely on a fixed and  
578 potentially non-representative national threshold, and that their robustness needs to be  
579 reassessed using more regionally appropriate threshold settings.

580         In response, we have substantially revised the analysis by replacing the original  
581 fixed threshold approach with region-specific FNR threshold ranges derived from the  
582 relationships between satellite-based HCHO/NO<sub>2</sub> and ground-based O<sub>3</sub> observations  
583 for different regions of China. Based on these updated thresholds, we reanalyzed OFS  
584 classifications and their long-term evolution for each major urban cluster.

585         The revised results confirm that the proportions of VOC-limited, transitional, and  
586 NO<sub>x</sub>-limited regimes do change to some extent after adopting region-specific thresholds,  
587 indicating that OFS classification is indeed sensitive to threshold choice. However, the  
588 overall regional contrasts and long-term regime evolution remain interpretable under  
589 the revised framework. To further assess robustness, we also added a threshold-  
590 sensitivity analysis under multiple threshold scenarios, which explicitly quantifies the  
591 uncertainty associated with threshold selection.

592         Accordingly, the conclusions in the revised Section 3.2 and the subsequent OFS  
593 analysis are now based on the region-specific threshold framework, rather than the  
594 original uniform threshold assumption. The detailed derivation and justification of these  
595 region-specific thresholds are provided in our response to Comment #4.

596

597 13. In Section 3.3, the ML validation results in Table S2 should be explicitly mentioned  
598 and cited in the main text; otherwise the reader cannot easily assess model performance  
599 and credibility.

600 Response: We have revised the manuscript by explicitly citing the model  
601 evaluation table in the main text and adding a concise summary of the validation results  
602 in Section 3.4.1 (Lines 477–490):

### 603 **3.4.1 Performance of RF models for OFS classification**

604 Table 1 presents a comparison of the five model configurations. Overall, all models  
605 demonstrate relatively high classification performance, with AS, GMS, and ROC-AUC  
606 all exceeding 0.70. Among the regions, the models for the YRD and PRD perform the  
607 best, with all category-specific metrics generally above 0.70.

608 In contrast, the BTH and FWP models show relatively low performance for  
609 minority classes, particularly the NO<sub>x</sub>-limited category, with F1 scores of 0.60 and 0.57,  
610 respectively, while other categories generally achieve metrics above 0.60, indicating  
611 moderate performance in identifying this category. In the SCB model, the NO<sub>x</sub>-limited  
612 category performs the worst, with PS, RS, and F1 all below 0.50, reflecting the  
613 difficulty for the model in effectively capturing its characteristics.

614 Overall, after sampling and hyperparameter optimization, the models achieve  
615 robust performance on the majority classes, but classification performance for minority  
616 classes remains limited. Ahmed et al. (2025) noted that SMOTE can effectively improve  
617 classification performance by addressing data imbalance, but it may also lead to  
618 decreased accuracy for majority classes, highlighting the trade-offs involved when

619 handling imbalanced datasets.

620 **Table 1. Performance metrics of the optimized model on the validation dataset.**

| Models | Class                                 | PS   | RS   | F1   | AS   | GMS  | ROC-AUC |
|--------|---------------------------------------|------|------|------|------|------|---------|
| BTH    | NO <sub>x</sub> -limited <sup>1</sup> | 0.51 | 0.73 | 0.60 | 0.94 | 0.83 | 0.96    |
|        | VOC-limited                           | 0.88 | 0.88 | 0.90 | 0.88 | 0.89 | 0.95    |
|        | Transitional                          | 0.83 | 0.78 | 0.81 | 0.83 | 0.82 | 0.90    |
| FWP    | NO <sub>x</sub> -limited <sup>1</sup> | 0.51 | 0.64 | 0.57 | 0.96 | 0.79 | 0.97    |
|        | VOC-limited                           | 0.88 | 0.88 | 0.88 | 0.86 | 0.85 | 0.93    |
|        | Transitional                          | 0.75 | 0.72 | 0.74 | 0.82 | 0.79 | 0.89    |
| YRD    | NO <sub>x</sub> -limited              | 0.84 | 0.87 | 0.85 | 0.89 | 0.88 | 0.95    |
|        | VOC-limited <sup>1</sup>              | 0.69 | 0.75 | 0.72 | 0.98 | 0.86 | 0.99    |
|        | Transitional                          | 0.90 | 0.87 | 0.88 | 0.87 | 0.86 | 0.93    |
| SCB    | NO <sub>x</sub> -limited <sup>1</sup> | 0.32 | 0.48 | 0.39 | 0.90 | 0.67 | 0.87    |
|        | VOC-limited <sup>1</sup>              | 0.51 | 0.68 | 0.58 | 0.94 | 0.81 | 0.92    |
|        | Transitional                          | 0.94 | 0.89 | 0.91 | 0.85 | 0.72 | 0.81    |
| PRD    | NO <sub>x</sub> -limited              | 0.85 | 0.82 | 0.84 | 0.92 | 0.88 | 0.96    |
|        | VOC-limited <sup>1</sup>              | 0.66 | 0.80 | 0.72 | 0.90 | 0.86 | 0.94    |
|        | Transitional                          | 0.86 | 0.82 | 0.84 | 0.81 | 0.81 | 0.88    |

621 <sup>1</sup>Minorities classes (categories with fewer samples).

622

623 14. For Fig. 7, please provide a more detailed explanation of what is shown: which  
624 class/output the SHAP values correspond to (especially when it comes to classification);  
625 whether the plotted values are the mean of SHAP values or mean(|SHAP|); and how the  
626 aggregation is performed across samples.

627 Response: We thank the reviewer for the valuable comments. We have clarified  
628 that Fig. 7 does not present raw SHAP values for a single class. Instead, it shows the  
629 relative contribution of each feature to the overall OFS classification in each regional  
630 model. Specifically, SHAP values were first calculated for each sample and for each of  
631 the three OFS classes. Then, for each class, the mean absolute SHAP value,  
632 mean(|SHAP|), was computed for each feature across all samples. These class-specific

633 mean(|SHAP|) values were subsequently averaged across the three OFS classes to  
634 obtain the overall mean(|SHAP|) for each feature in a given regional model. Finally,  
635 these overall mean(|SHAP|) values were normalized to express the relative contribution  
636 percentage of each feature, which facilitates comparison among regions.

637 We have added a more explicit explanation in the revised manuscript to clarify (i)  
638 which SHAP output is used, (ii) that the plotted values are based on mean(|SHAP|)  
639 rather than signed SHAP values, and (iii) how the aggregation is performed across  
640 classes and samples (Lines 492–496):

641 For each regional model, SHAP values were first calculated for each sample and  
642 for each OFS class. For each class, mean(|SHAP|) was then computed for each feature  
643 across all samples, and these class-specific mean(|SHAP|) values were subsequently  
644 averaged across the three OFS classes to represent the overall importance of each  
645 feature in that regional model. To facilitate comparison among regions, the resulting  
646 overall mean(|SHAP|) values were further normalized and expressed as relative  
647 contribution percentages.

648

649 15. In L323 (“gradual shifts in climate, e.g., warming, increased solar radiation, and  
650 changes in stability”) and L328 (“the complex composition of residential heating,  
651 solvent use, and industrial emissions”), I could not find direct evidence or datasets in  
652 the manuscript supporting these claims. Please provide supporting analyses/references,  
653 or revise these statements to align with the evidence presented.

654 Response: We agree that the original statements were not sufficiently supported by

655 direct evidence or datasets presented in the manuscript. In the revised version, we have  
656 therefore removed these unsupported statements to ensure that all interpretations  
657 remain closely aligned with the analyses and evidence provided in the study.

658

659 16. In L358, SHAP values decompose contributions relative to an expected output (base  
660 value). Because the manuscript fits separate models for different regions (each with its  
661 own baseline and data distribution), the absolute magnitudes of SHAP values are not  
662 directly comparable across regions. Please revise this part of the discussion and, if  
663 cross-region comparisons are intended, adopt a method that ensures comparability (e.g.,  
664 reporting relative importance within each region).

665 Response: We fully agree that, because SHAP values are defined relative to the  
666 model-specific expected output and are affected by the underlying data distribution, the  
667 absolute magnitudes of SHAP values are not directly comparable across separately  
668 trained regional models. In response, we have revised both the analysis and the  
669 discussion to avoid overstating such comparisons.

670 (1) To reduce structural differences among regional models, we retrained all  
671 regional RF models using a unified set of hyperparameter settings. While this does not  
672 eliminate differences in baseline prediction and data distribution, it helps ensure that  
673 the regional models are constructed under a consistent modeling framework. We have  
674 clarified it in Lines 249–257:

675 To account for class imbalance and optimize model performance, the Synthetic  
676 Minority Over-sampling Technique (SMOTE; Fernandez et al., 2018) was applied to

677 the training data. To reduce the structural differences of the model and facilitate  
678 consistent comparison across the five regions, a unified set of model parameters was  
679 adopted for all regional models. Although this does not eliminate differences in model  
680 baseline and data distribution across regions, it helps ensure that the regional models  
681 are constructed under a consistent modeling framework. Hyperparameter optimization  
682 was performed using GridSearchCV (Hastie et al., 2009; Ahmed et al., 2025) over  
683 combinations of candidate parameter values. Based on validation performance across  
684 all regions, a single parameter set was selected as the optimal configuration. The final  
685 model configuration consisted of 200 trees ( $n\_estimators = 200$ ), a maximum tree depth  
686 of 25 ( $max\_depth = 25$ ), and a minimum of 1 sample per leaf ( $min\_samples\_leaf = 1$ ).

687 (2) For cross-region comparison, we no longer interpret absolute SHAP  
688 magnitudes directly. Instead, within each regional model, we calculated the overall  
689 mean absolute SHAP value [ $mean(|SHAP|)$ ] for each feature and then normalized these  
690 values to obtain the relative contribution percentage of each variable within that region.  
691 The regional comparison in the revised manuscript is therefore based on relative  
692 importance within each model, rather than raw SHAP magnitudes across models. We  
693 have clarified this explicitly in the Methods (Lines 274–279) sections:

694 For each regional model, the mean absolute SHAP value [ $mean(|SHAP|)$ ] was  
695 calculated for each feature. Because SHAP values are defined relative to the model-  
696 specific expected output and are influenced by the underlying data distribution, the  
697 absolute magnitudes of SHAP values are not directly comparable across different  
698 regional models. Therefore, to facilitate cross-region comparison, these overall

699 mean(|SHAP|) values were further normalized to obtain the relative contribution of each  
700 variable within each regional model. It should be noted that this metric reflects the  
701 statistical contribution of individual features to model predictions rather than their  
702 direct causal effects in atmospheric physical or chemical processes.

703 (3) In the revised discussion, we have avoided direct statements comparing the  
704 absolute sizes of SHAP values across regions. Instead, we focus on the relative  
705 contribution structure within each region and the directional interpretation of individual  
706 predictors in the SHAP summary plots (Lines 491–523):

### 707 **3.4.2 Relative contributions and regional heterogeneity of OFS influencing** 708 **factors**

709 For each regional model, SHAP values were first calculated for each sample and  
710 for each OFS class. For each class, mean(|SHAP|) was then computed for each feature  
711 across all samples, and these class-specific mean(|SHAP|) values were subsequently  
712 averaged across the three OFS classes to represent the overall importance of each  
713 feature in that regional model. To facilitate comparison among regions, the resulting  
714 overall mean(|SHAP|) values were further normalized and expressed as relative  
715 contribution percentages. Figure 7 shows the relative contribution of each feature to  
716 OFS classification in the five city clusters. Overall, emission-related variables  
717 contribute more than meteorological variables, with their total contribution ranging  
718 from 50.1% in YRD to 72.2% in PRD. This result indicates that OFS classification is  
719 primarily constrained by emission-related factors in most city clusters. In YRD,  
720 meteorological and emission-related variables contribute almost equally to OFS

721 classification, accounting for 49.9% and 50.1%, respectively.

722 A closer examination of individual emission predictors reveals substantial regional  
723 heterogeneity. In BTH, FWP, and YRD, CO and PM<sub>2.5</sub> make the largest contributions  
724 (17.5% and 14.0% in BTH; 16.3% and 16.5% in FWP; 14.3% and 13.3% in YRD).  
725 NMVOCs also show a relatively large contribution in BTH, reaching 13.0%. By  
726 contrast, SCB and PRD are characterized by high contributions from CO and NO<sub>x</sub> (19.0%  
727 and 15.9% in SCB; 24.4% and 17.6% in PRD). The strong model importance of CO  
728 and PM<sub>2.5</sub> likely reflects both the influence of their significant long-term trends in the  
729 model and their broader association with regional photochemical environments. First,  
730 both variables show a two-stage trend in most urban clusters from 2005 to 2023, with  
731 an initial period of non-significant change followed by a significant decline (Fig. S5),  
732 a pattern that is similar to the phase-like changes in OFS identified in this study (Fig.  
733 S6). Second, CO can enhance hydroperoxy radical (HO<sub>2</sub>) production through the  
734 reaction  $\text{CO} + \text{OH} \rightarrow \text{HO}_2$ , thereby increasing O<sub>3</sub> production efficiency under  
735 conditions of declining NO<sub>x</sub> (Ren et al., 2013; Seinfeld and Pandis, 2016). Third, a  
736 reduction in PM<sub>2.5</sub> may weaken its heterogeneous uptake of hydroxyl radicals (HO<sub>x</sub>)  
737 and NO<sub>x</sub> and thus allow more radicals and reactive nitrogen to remain available for  
738 photochemical O<sub>3</sub> reactions (Li et al., 2019). Therefore, these results suggest that CO  
739 and PM<sub>2.5</sub> function not simply as co-emitted pollutants, but also as informative  
740 predictors of broader changes in oxidation capacity and regional pollution conditions.

741 Meteorological predictors also show robust and regionally distinct contributions.

742 Surface pressure (SP), relative humidity (RH), and temperature (T) are consistently

743 important across regions, highlighting the roles of weather system stability, moisture  
 744 conditions and thermal conditions in modulating photochemistry and pollutant  
 745 accumulation. In the YRD, the contribution of RH is particularly notable (25.5%), while  
 746 in the FWP, SP contributes more substantially (23.3%), indicating that OFS in these  
 747 regions is also strongly influenced by meteorological factors. More broadly,  
 748 meteorological factors can influence atmospheric oxidation capacity, boundary-layer  
 749 structure, and pollutant dispersion, thereby shaping both the spatial distribution and  
 750 temporal evolution of OFS. Therefore, the relatively high contributions of certain  
 751 meteorological factors in the YRD and FWP may reflect a greater sensitivity of OFS  
 752 classification to regional humidity and atmospheric stability conditions.

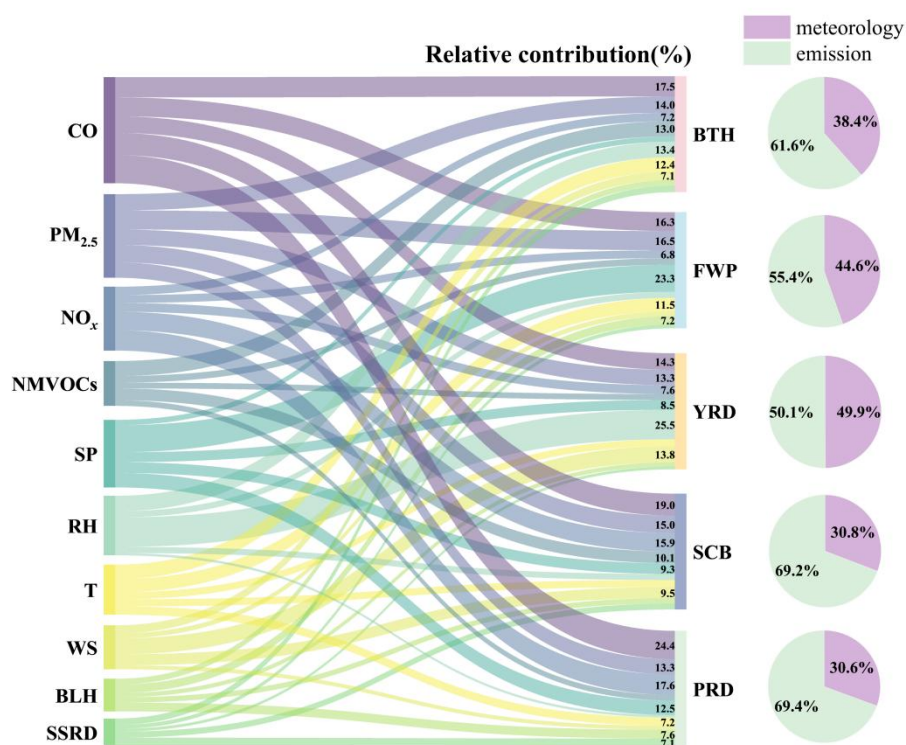

753 **Figure 7. Relative contribution of emission-related and meteorological factors to overall OFS**  
 754 **classification.**  
 755

756 [And Lines 567–599:](#)

#### 757 **3.4.4 SHAP responses of individual predictors across OFS regimes**

758 To further interpret how individual predictors influence OFS classification, we  
759 examined the SHAP value distributions of different variables for each urban cluster (Fig.  
760 9). The results reveal both common features and regional differences in the directional  
761 and nonlinear effects of the predictors. In general, many variables show broadly  
762 opposite SHAP responses between VOC-limited and NO<sub>x</sub>-limited regimes, indicating  
763 that the same predictor can exert contrasting effects under different chemical sensitivity  
764 conditions.

765 For emission-related variables, samples classified as NO<sub>x</sub>-limited are generally  
766 associated with relatively low emission levels. By contrast, under VOC-limited regimes,  
767 higher emission values are more consistently associated with positive SHAP values,  
768 indicating a greater probability of being classified as VOC-limited. This pattern is  
769 broadly consistent with the spatial distribution of OFS, in which NO<sub>x</sub>-limited regimes  
770 are more common in suburban or peripheral areas, whereas VOC-limited regimes are  
771 concentrated in urban cores with stronger anthropogenic emissions (Xue et al., 2014;  
772 Wang et al., 2021; Johnson et al., 2024). Overall, the regional differences in the SHAP  
773 responses of emission variables likely reflect differences in local emission intensity and  
774 chemical sensitivity.

775 Meteorological variables also show substantial but regionally distinct effects on  
776 OFS classification. SP, RH, and T emerge as influential predictors in several regions,  
777 but their directional effects vary geographically. In BTH and YRD, higher temperatures  
778 are more closely associated with NO<sub>x</sub>-limited classification, which may reflect

779 enhanced photochemical activity and BVOCs emissions under warm conditions (Pétron  
780 et al., 2001; Duncan et al., 2009). In several other regions, however, higher temperature  
781 is more often linked to VOC-limited classification, which may also be related to the  
782 spatial distribution of urban heat islands (Zhang et al., 2026; Zhou et al., 2015). SP  
783 influences pollutant accumulation and vertical mixing through atmospheric stability  
784 and subsidence; in general, higher SP favors VOC-limited classification, whereas lower  
785 SP is more closely associated with NO<sub>x</sub>-limited regimes, with particularly asymmetric  
786 SHAP responses in YRD. RH is especially important in BTH and YRD, where high  
787 humidity tends to promote VOC-limited classification. Higher relative humidity may  
788 promote aerosol growth, thereby reducing the radiation reaching the surface and  
789 limiting the photochemical production of HCHO (Ye et al., 2016).

790 Compared with VOC-limited and NO<sub>x</sub>-limited regimes, the transitional regime  
791 shows less consistent directional responses across variables and regions. This suggests  
792 that transitional regimes are governed by a more complex combination of emissions  
793 and meteorological influences, with stronger nonlinearity and greater classification  
794 uncertainty. Such complexity implies that transitional regimes may be the most difficult  
795 to manage using simple precursor-reduction strategies alone and may require more  
796 detailed process-based analysis to support effective control design.

797 Overall, the SHAP analysis highlights that OFS classification is shaped by both  
798 shared and region-specific predictor responses. Emission-related variables remain the  
799 dominant contributors in most regions, whereas meteorological variables modulate the  
800 OFS transitions in a region-dependent manner. These results provide a more process-

801 informed interpretation of the regional heterogeneity and temporal evolution of OFS  
 802 across China during the warm season.

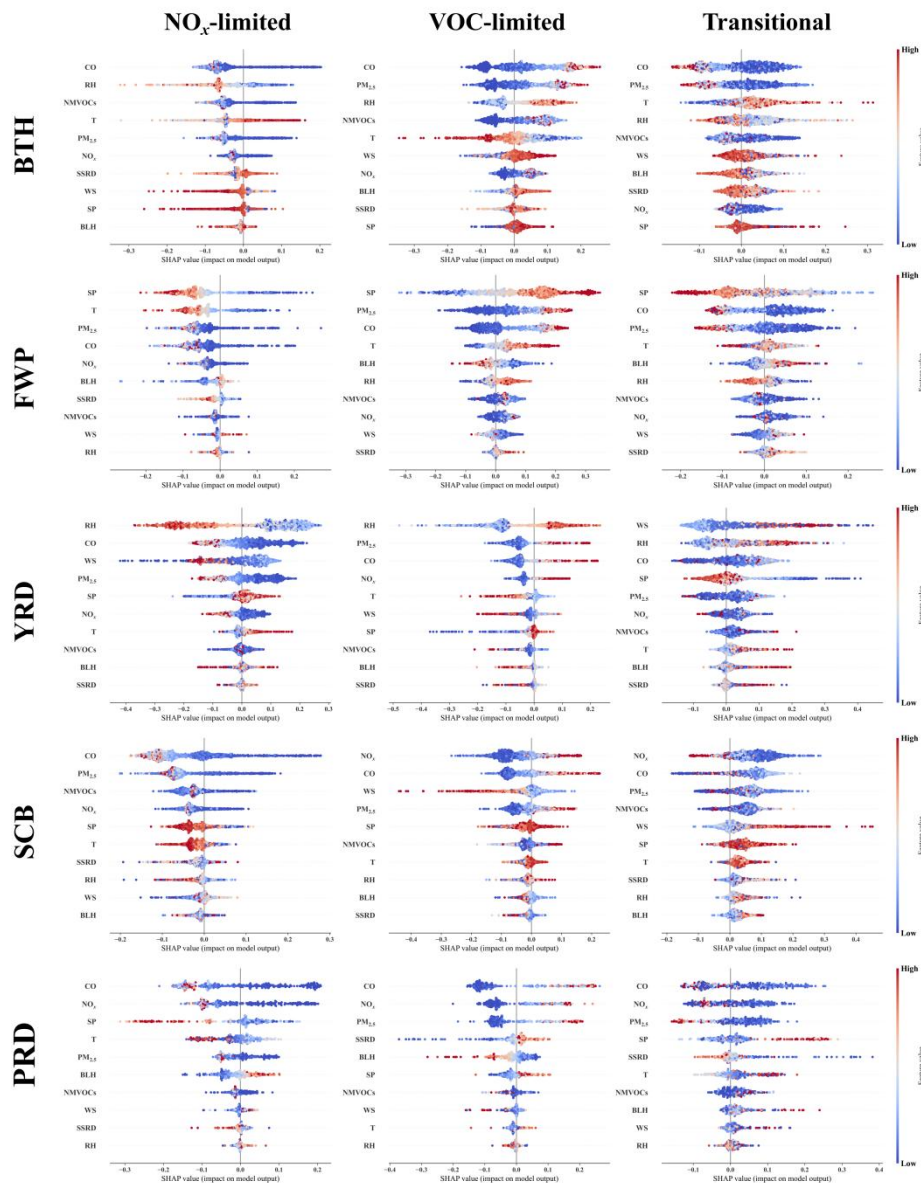

803  
 804 **Figure 9. SHAP value distributions of individual predictors in the RF models for the five urban clusters in**  
 805 **China.**

806  
 807 17. The conclusion in L382 (“dominance of slowly varying meteorological drivers”)  
 808 seems inconsistent with the narrative across Sections 3.2 and 3.3. Section 3.2  
 809 emphasizes anthropogenic precursor reductions driving a shift from VOC-limited to

810 NO<sub>x</sub>-limited regimes, whereas Section 3.3 claims meteorology contributes >60% and  
811 dominates OFS changes. Moreover, Section 3.3 appears to provide only an overall  
812 (time-aggregated) attribution. To reconcile these results, the authors should add time-  
813 resolved attribution analyses that track meteorology vs emissions contributions over  
814 time, in a way that directly corresponds to the trend/stage analyses in Section 3.2.

815       Response: We agree that the original conclusion was not sufficiently consistent  
816 with the narrative in Sections 3.2 and 3.3, particularly in overstating the role of  
817 meteorology relative to emissions. In response, we have substantially revised the  
818 analysis and the related text to improve temporal consistency and to better reconcile the  
819 trend analysis with the attribution results.

820       (1) Following the revision of the OFS framework, all analyses were refocused on  
821 the warm season (April–September) on a yearly basis and based on the newly derived  
822 region-specific FNR thresholds. The RF models were retrained using these updated  
823 OFS categories, which led to some changes in the attribution results and their  
824 interpretation. The revised manuscript now shows that emission-related variables  
825 generally remain the dominant predictors of OFS classification across most urban  
826 clusters, while meteorological contributions become more evident only under certain  
827 regional and temporal conditions.

828       We have modified the expression in Lines 497–500:

829       Overall, emission-related variables contribute more than meteorological variables,  
830 with their total contribution ranging from 50.1% in YRD to 72.2% in PRD. This result  
831 indicates that OFS classification is primarily constrained by emission-related factors in

832 most city clusters. In YRD, meteorological and emission-related variables contribute  
833 almost equally to OFS classification, accounting for 49.9% and 50.1%, respectively.

834 (2) To directly address the reviewer's concern about temporal consistency, we  
835 added a time-resolved attribution analysis by comparing two periods, 2005–2012 and  
836 2013–2023, in a way that corresponds to the stage-based analysis in Section 3.2. The  
837 revised results show that emission-related variables remained dominant in most regions  
838 and OFS categories during both periods, generally accounting for more than 50% of the  
839 total contribution. At the same time, the relative contribution of meteorological factors  
840 increased modestly after 2013 in several regions and categories, indicating that  
841 meteorological regulation became more pronounced under a cleaner emission  
842 background, but did not replace emissions as the primary driver overall. We have added  
843 the relevant information in Lines 526–548:

#### 844 **3.4.3 Regional and temporal shifts in OFS-related factor contributions**

845 To further characterize the temporal evolution of the factors influencing OFS, we  
846 compared the relative contributions of emission-related and meteorological variables  
847 between the warm-season periods of 2005–2012 and 2013–2023 (Fig. 8). Overall,  
848 emission-related variables remained the dominant predictors across most urban clusters  
849 and OFS categories in both periods, with their contributions generally exceeding 50%.  
850 This suggests that the long-term evolution of OFS in China was primarily governed by  
851 changes in precursor emissions, although the relative role of meteorology varied by  
852 region and OFS category.

853 For the NO<sub>x</sub>-limited regime, the contributions of meteorological and emission-

854 related factors in YRD were broadly comparable, whereas emission-related  
855 contributions in BTH, YRD, and PRD increased slightly after 2013 (+4.6%, +2.2%, and  
856 +3.5%, respectively). By contrast, meteorological contributions increased moderately  
857 in FWP and SCB (+4.2% and +4.3%, respectively). In the VOC-limited and transitional  
858 regimes, emission-related factors also remained dominant overall. However,  
859 meteorological contributions to the VOC-limited regime increased markedly after 2013  
860 in BTH, FWP, and PRD, by +8.6%, +6.7%, and +13.0%, respectively. For the  
861 transitional regime, meteorological contributions increased in all urban clusters except  
862 YRD, accompanied by corresponding declines in emission-related contributions of  
863 approximately 2.0%–7.3%.

864 From an overall perspective (Fig. 8d), the relative contribution of emission-related  
865 factors decreased slightly after 2013 in BTH, FWP, SCB, and PRD, by about 2.0%–  
866 5.6%. In YRD, the relative contributions of meteorological and emission-related factors  
867 remained broadly comparable, although the balance shifted slightly toward emission-  
868 related influences after 2013. Taken together, these results indicate that, while OFS  
869 classification remained predominantly emission-driven, the regulatory role of  
870 meteorology became more pronounced after 2013. This pattern suggests a modest  
871 transition from a regime controlled mainly by emissions toward one jointly modulated  
872 by emissions and meteorological conditions. Such a shift is consistent with the  
873 substantial reduction in precursor emissions after 2013 and implies that, under a cleaner  
874 emission background (Fig. S5), OFS classification may become increasingly sensitive  
875 to meteorological variability.

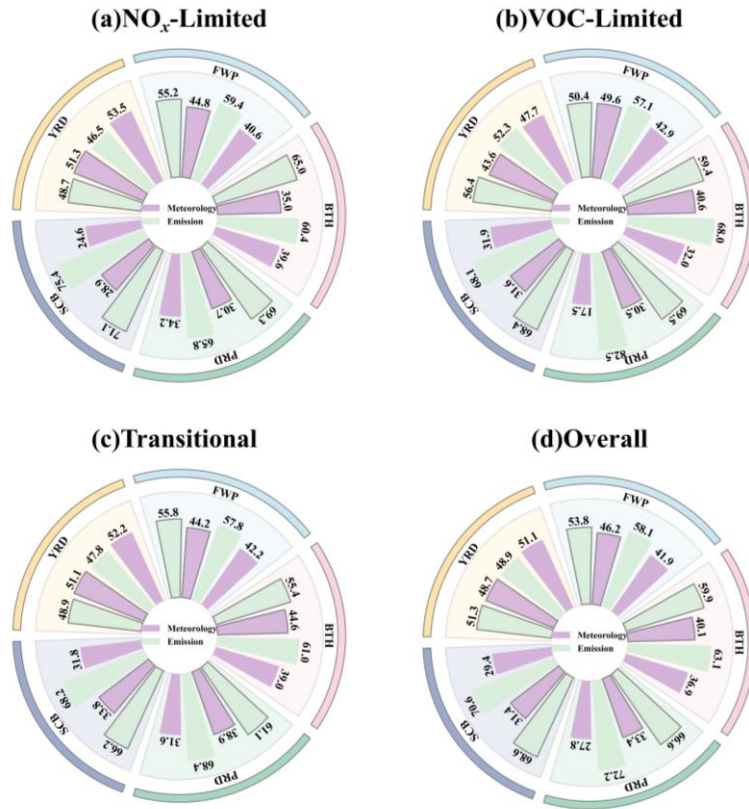

876  
 877  
 878  
 879  
 880  
 881  
 882  
 883  
 884  
 885  
 886  
 887  
 888  
 889

**Figure 8. Relative contributions (%) of emission-related and meteorological factors to OFS classification in five urban clusters during the warm season (April–September) for the periods of 2005–2012 and 2013–2023, shown separately for (a) NO<sub>x</sub>-limited, (b) VOC-limited, (c) transitional, and (d) overall OFS states. Gray outlined bars denote 2013–2023, whereas bars without outlines denote 2005–2012.**

890 **Reviewer:2**

891 **Comments to the Author:**

892 1. The manuscript tackles a central issue in China's "post-PM<sub>2.5</sub> era": how ozone  
893 formation sensitivity (OFS) evolves under the combined influence of emission controls  
894 and climate variability. The long-term, national-scale framework based on satellite  
895 precursors (OMI NO<sub>2</sub> and HCHO, 2005–2023), together with the integration of an  
896 indicator approach (FNR = HCHO/NO<sub>2</sub>) and explainable machine learning (RF–SHAP),  
897 is compelling and potentially valuable for informing differentiated ozone-control  
898 strategies. Overall, the study is clearly structured and well-written. Methods are  
899 technically robust. The topic and findings are highly relevant to atmospheric chemistry  
900 and broadly align with the scope and scientific standards of Atmospheric Chemistry  
901 and Physics. Nevertheless, several issues should be addressed before the manuscript  
902 can be considered suitable for publication in ACP.

903 [Response: We sincerely thank the reviewer for the positive evaluation of our study.](#)  
904 [We have revised the manuscript carefully in response to the comments, which were](#)  
905 [highly constructive and have helped us further improve the quality of the paper.](#)

906

907 **Specific comments:**

908 2. Using policy issuance/implementation (e.g., 2013) as the breakpoint for phase  
909 division is reasonable. However, incorporating a formal change-point analysis (e.g.,  
910 Pettitt test or a Bayesian change-point method) would substantially strengthen the  
911 argument by demonstrating whether NO<sub>2</sub>, FNR, and/or the regime area fractions exhibit

912 statistically significant structural shifts around 2013. This would make the “policy-  
913 driven phase reversal” claim more robust, more publishable, and less open to challenge.

914       Response: We sincerely thank the reviewer for this valuable suggestion. We agree  
915 that defining the phase division solely based on the timing of policy implementation is  
916 not sufficient, and that a formal change-point analysis is needed to better support the  
917 stage-based framework.

918       In the revised manuscript, we have therefore added a Pettitt test to detect structural  
919 shifts in the warm-season annual series of NO<sub>2</sub>, HCHO, and FNR for the five major  
920 urban clusters and the other regions of China during 2005–2023. The corresponding  
921 method, equations, and description have been added to the revised Methods section,  
922 and the results are summarized in Table S2.

923       The Pettitt test results show that the detected change points are generally  
924 concentrated around 2013–2017, although the exact timing varies among variables and  
925 regions. In particular, significant change points in FNR were identified around 2013–  
926 2014 in most regions, which provides quantitative support for using 2013 as the  
927 common dividing year in the subsequent analyses, because these structural shifts  
928 broadly coincide with the implementation of major clean-air policies in China.

929       At the same time, the test results also indicate that the phase behavior is not  
930 completely uniform across regions. For example, SCB did not show a statistically  
931 significant FNR change point, whereas PRD exhibited a distinct long-term increasing  
932 pattern rather than the clearer two-stage transition seen in BTH, FWP, and YRD. We  
933 have therefore revised the manuscript to make the interpretation more cautious and

934 region-specific, rather than implying that all regions follow the same policy-driven  
935 phase reversal.

936 Accordingly, the revised manuscript now uses 2013 as a common reference year  
937 supported by formal change-point analysis, while also explicitly acknowledging  
938 regional differences in the timing and form of structural shifts. This revision makes the  
939 staging framework more robust and less dependent on policy timing alone.

940 We have clarified it in Lines 201–215:

941 To further identify structural shifts in the long-term evolution of O<sub>3</sub> precursors and  
942 OFS, and to provide an objective basis for subsequent phase-based analyses, we applied  
943 the Pettitt test to the annual time series of NO<sub>2</sub>, HCHO, and FNR in each region. The  
944 Pettitt test is a non-parametric method for detecting a single abrupt change point in a  
945 time series and does not require the data to follow a normal distribution (Pettitt, 1979).  
946 It has been widely used in environmental studies to detect statistically significant shifts  
947 in long-term observations (Baruah et al., 2021). The test statistic  $U_{t, n}$  is defined as:

$$948 U_{t, n} = \sum_{i=1}^t \sum_{j=t+1}^n \text{sgn}(x_j - x_i) \quad (t=1, 2, \dots, n), \quad (5)$$

949 where  $x_i$  and  $x_j$  are the values of the time series, and  $\text{sgn}(\cdot)$  denotes the sign function.

950 The change point is identified as the time corresponding to the maximum absolute value  
951 of  $U_{t, n}$ , and its significance is evaluated as:

$$952 p = 2 \exp\left(-\frac{6k_t^2}{n^3+n^2}\right), \quad (6)$$

953 where  $k_t = \max_{1 \leq t < n} |U_{t, n}|$ . A p-value below 0.05 was considered statistically significant.

954 In this study, the Pettitt test was applied to the annual warm-season (April–

September) series of NO<sub>2</sub>, HCHO, and FNR for each region during 2005–2023. For each variable, the year corresponding to the maximum absolute test statistic was taken as the detected change point. Because the Pettitt test identifies only one abrupt change point, it may not fully capture series with multiple shifts or several equally strong candidates (Zhang and Song, 2015). Therefore, the detected change points were interpreted together with the temporal evolution of each variable and the broader policy context.

**Table S2. Mann–Kendall trend test and Sen’s slope estimate for HCHO, NO<sub>2</sub>, and FNR in the five major urban agglomerations in China during the warm season (April–September) from 2005 to 2023.**

| Variable                     | Region | Sen’s slope | MK p-value | Pettitt’s change point | Pettitt’s p-value |
|------------------------------|--------|-------------|------------|------------------------|-------------------|
| NO <sub>2</sub> <sup>a</sup> | BTH    | -0.23       | < 0.05     | 2015                   | < 0.05            |
|                              | FWP    | -0.09       | < 0.05     | 2014                   | < 0.05            |
|                              | YRD    | -0.14       | < 0.05     | 2014                   | < 0.05            |
|                              | SCB    | -0.01       | > 0.05     | 2008                   | > 0.05            |
|                              | PRD    | -0.20       | < 0.05     | 2014                   | < 0.05            |
| HCHO <sup>a</sup>            | BTH    | 0.15        | < 0.05     | 2013                   | < 0.05            |
|                              | FWP    | 0.12        | < 0.05     | 2015                   | < 0.05            |
|                              | YRD    | 0.12        | < 0.05     | 2015                   | < 0.05            |
|                              | SCB    | 0.09        | < 0.05     | 2017                   | < 0.05            |
|                              | PRD    | 0.06        | < 0.05     | 2015                   | > 0.05            |
| FNR <sup>b</sup>             | BTH    | 0.06        | < 0.05     | 2014                   | < 0.05            |
|                              | FWP    | 0.06        | < 0.05     | 2013                   | < 0.05            |
|                              | YRD    | 0.04        | < 0.05     | 2013                   | < 0.05            |
|                              | SCB    | 0.00        | < 0.05     | 2017                   | > 0.05            |
|                              | PRD    | 0.06        | > 0.05     | 2014                   | < 0.05            |

<sup>a</sup> HCHO and NO<sub>2</sub> are reported in units of  $\times 10^{15}$  molec cm<sup>-2</sup>. <sup>b</sup> FNR is dimensionless.

And Lines 282–287:

966 Before examining the spatial and temporal evolution of O<sub>3</sub> precursors and FNR,  
967 we first assessed whether their long-term changes were characterized by structural  
968 shifts. Pettitt test results (Table S2) indicate that significant change points in warm-  
969 season NO<sub>2</sub>, HCHO, and FNR were generally clustered around 2013–2017, although  
970 the exact timing varied among variables and regions. Because these shifts broadly  
971 coincided with the implementation of the Air Pollution Prevention and Control Action  
972 Plan (2013–2017), 2013 was adopted as the common dividing year for the subsequent  
973 analyses. The following sections therefore compare the two periods 2005–2012 and  
974 2013–2023.

975

976 3. FNR thresholds (VOC-limited < 1; NO<sub>x</sub>-limited > 2) may vary across seasons,  
977 regions, and chemical environments. I recommend adding a clearer statement and  
978 discussion, preferably in the Conclusions, on the uncertainty and potential variability  
979 of these thresholds, and how such variability might influence regime classification and  
980 inferred trends.

981 Response: We sincerely thank the reviewer for this constructive comment. We  
982 fully agree that FNR thresholds are not universal and may vary with season, region, and  
983 chemical environment, and that such variability can directly affect OFS classification  
984 and the interpretation of long-term regime changes. In response, we have substantially  
985 revised the manuscript to make this uncertainty more explicit and to assess its  
986 implications more systematically.

987 (1) Instead of relying on fixed national thresholds such as VOC-limited < 1 and

988 NO<sub>x</sub>-limited > 2, we derived region-specific FNR threshold ranges for six regions in  
989 China based on the fitted relationships between satellite-based FNR and ground-  
990 observed high-O<sub>3</sub> probability during the warm season. The revised results show clear  
991 regional heterogeneity in these thresholds, confirming that a uniform national threshold  
992 is insufficient for OFS diagnosis in China. We have clarified it in Lines 160–184:

993       OFS regimes were then identified according to the corresponding FNR threshold  
994 ranges. The threshold ranges were determined mainly following the method of Jin et al.  
995 (2020). In this study, region-specific FNR thresholds across China were derived by  
996 combining OMI satellite observations with surface O<sub>3</sub> measurements. This approach is  
997 also consistent with previous studies that derived threshold ranges from fitted O<sub>3</sub>–FNR  
998 relationships (Wang et al., 2021; Ren et al., 2022; Chen et al., 2024). In practice, the  
999 transition of OFS from VOC-limited to NO<sub>x</sub>-limited regimes is gradual rather than  
1000 abrupt. This transition can be influenced by multiple factors, including topography,  
1001 meteorological conditions, and the spatial resolution of satellite observations (Jin et al.,  
1002 2020). Because these influencing factors vary across China, the corresponding FNR  
1003 threshold ranges are also expected to differ among regions. For this reason, OFS  
1004 regimes were identified using region-specific FNR threshold ranges. China was divided  
1005 into six regions, including five major urban clusters with severe O<sub>3</sub> pollution, namely  
1006 BTH, FWP, YRD, SCB, and PRD, and one additional category comprising all  
1007 remaining areas, referred to as other regions of China (ORC) (Lu et al., 2018). These  
1008 six regions were used as the basic units for deriving region-specific FNR threshold  
1009 ranges, which were then applied to identify OFS regimes in each region.

1010 Because O<sub>3</sub> pollution in China occurs mainly during the warm season (April–  
1011 September) (Lu et al., 2020b), the analysis was restricted to April–September in 2015–  
1012 2023. To match the OMI overpass time, surface O<sub>3</sub> concentrations at 13:00 and 14:00  
1013 local time were averaged for each site and day. The resulting daily O<sub>3</sub> concentrations  
1014 were then collocated with OMI FNR values at the corresponding grid cells. For each  
1015 site, the high-O<sub>3</sub> probability was then defined as the fraction of days during the study  
1016 period on which the 13:00–14:00 mean O<sub>3</sub> concentration exceeded 160 μg m<sup>-3</sup>. The  
1017 resulting paired samples were subsequently pooled within each region for threshold  
1018 derivation.

1019 To focus on polluted conditions, samples with NO<sub>2</sub> vertical column densities  
1020 below  $1.5 \times 10^{15}$  molec cm<sup>-2</sup> were excluded, following previous studies (Jin et al., 2020;  
1021 Wang et al., 2021). In addition, high-end outliers (5% or 10%, depending on the region)  
1022 were removed prior to fitting to reduce the influence of extreme values (Chen et al.,  
1023 2024). After quality control, paired high-O<sub>3</sub> probability and FNR samples in each region  
1024 were grouped into 100 bins according to FNR and a cubic polynomial was fitted to the  
1025 binned relationship between high-O<sub>3</sub> probability and FNR. The FNR interval  
1026 corresponding to fitted high-O<sub>3</sub> probability values above the 90th percentile was then  
1027 defined as the threshold range for that region (Jin et al., 2020).

1028 (2) To directly address the uncertainty raised by threshold variability, we added a  
1029 dedicated threshold-sensitivity analysis using three threshold scenarios: S1, the warm-  
1030 season thresholds derived in this study; S2, the minimum–maximum ranges compiled  
1031 from previous studies; and S3, the average of the corresponding minimum and

1032 maximum values from the literature. Based on these three schemes, we reassessed OFS  
1033 classification in the five major urban clusters during the warm season from 2005 to  
1034 2023. The results show that threshold choice can substantially alter the estimated  
1035 proportions of VOC-limited, transitional, and NO<sub>x</sub>-limited regimes, and that the  
1036 magnitude of this effect is strongly region dependent. We have added relevant  
1037 information in Lines 352–375:

1038       Given these pronounced regional differences, we further assessed how threshold  
1039 uncertainty affects OFS classification. Three threshold-range scenarios were designed.  
1040 Specifically, Scenario 1 (S1) used the threshold ranges derived in this study for the  
1041 warm season of 2015–2023, Scenario 2 (S2) adopted the minimum–maximum  
1042 threshold ranges reported in previous studies, and Scenario 3 (S3) used threshold ranges  
1043 calculated from the average of the corresponding maximum and minimum values. The  
1044 threshold ranges for the six regions under S1-S3 scenarios are listed in Table S1. These  
1045 three scenarios were then used to evaluate the sensitivity of OFS classification to  
1046 different FNR threshold selections in the five major city clusters during the warm  
1047 season over 2005–2023 (Fig. S4).

1048       The results show that OFS classification is strongly affected by threshold choice,  
1049 although the magnitude of this effect varies markedly across regions. Among the five  
1050 regions, FWP shows the largest sensitivity to threshold variation, with changes ranging  
1051 from –53.8 % to 51.6 % and an average value of about 22.0 %. SCB also exhibits  
1052 substantial sensitivity, with corresponding changes of –48.8 % to 52.0 %. In contrast,  
1053 PRD is relatively less sensitive, with changes ranging from –36.3 % to 21.1 % and an

1054 average value of about 17.0 %. BTH and YRD show intermediate responses, with  
1055 ranges of -31.0 % to 37.2 % and -31.5 % to 31.5 %, respectively. These results indicate  
1056 that the uncertainty introduced by threshold selection is not spatially uniform but  
1057 depends on regional photochemical characteristics and the width of the transitional  
1058 range.

1059 Figure S4 further shows that the influence of threshold choice is often asymmetric,  
1060 with some scenarios producing much larger positive or negative deviations than others.  
1061 This indicates that OFS classification does not respond linearly to threshold  
1062 perturbations. In particular, threshold ranges compiled from previous studies can  
1063 produce substantial departures from the classification results obtained using the region-  
1064 specific thresholds derived here. Even the average-threshold scenario still leads to  
1065 noticeable deviations in several regions. These findings suggest that threshold  
1066 transferability across regions is limited and that applying literature-based thresholds  
1067 without regional constraints may introduce considerable bias into OFS diagnosis.

1068 Overall, these results demonstrate that uncertainty in FNR thresholds can  
1069 substantially alter the estimated proportions of different OFS regimes. Region-specific  
1070 thresholds derived from regional observational relationships therefore provide a more  
1071 robust basis for OFS classification than fixed or literature-averaged thresholds.

1072

1073

1074

1075 **Table S1. Comparison of the FNR threshold ranges for the five city clusters during the warm season (April–**  
 1076 **September, 2005–2023) derived in this study and reported in previous studies. Values in brackets indicate**  
 1077 **the threshold ranges.**

| Region | FNR threshold ranges              |                                  |                                  | Threshold Range        | Studied period         | Reference                              | Spatial Coverage      |
|--------|-----------------------------------|----------------------------------|----------------------------------|------------------------|------------------------|----------------------------------------|-----------------------|
|        | Scenarios 1<br>(S1 <sup>1</sup> ) | Scenario 2<br>(S2 <sup>2</sup> ) | Scenario 3<br>(S3 <sup>3</sup> ) |                        |                        |                                        |                       |
| BTH    | 2.33                              | [1.51, 3.30]                     | [1.00, 5.10]                     | [1.92, 2.85]           | Apr.–Sep.<br>2019–2022 | BTH                                    | Song et al., 2023     |
|        |                                   |                                  |                                  | [4.0, 5.1]             | May–Oct.<br>2018–2022  | Jing-Jin-Ji-Lu-<br>Yu<br>(JJLY)        | Li et al., 2024       |
|        |                                   |                                  |                                  | [3.0, 3.8]             | Apr.–Sep.<br>2019–2021 | Beijing-<br>Tianjin-Hebei-<br>Shandong | Ren et al., 2022      |
|        |                                   |                                  |                                  | [1.142, 2.268]         | May–Nov.<br>2016–2018  | North China<br>(NC)                    | Du et al., 2022       |
|        |                                   |                                  |                                  | [1.2, 2.0]             | Apr.–Oct.<br>2013–2014 |                                        |                       |
|        |                                   |                                  |                                  | [1.1, 1.9]             | Apr.–Oct.<br>2015–2016 | BTH                                    | Zhang et al.,<br>2024 |
|        |                                   |                                  | [1.0, 1.8]                       | Apr.–Oct.<br>2017–2019 |                        |                                        |                       |
| FWP    | 3.42                              | [2.26, 4.77]                     | [1.14, 4.30]                     | [1.96, 3.19]           | May–Nov.<br>2016–2018  | North China<br>(NC)                    | Du et al., 2022       |
|        |                                   |                                  |                                  | [1.524, 3.001]         | May–Nov.<br>2016–2018  | Northwest<br>China<br>(NWC)            | Du et al., 2022       |
|        |                                   |                                  |                                  | [3.2, 4.3]             | Apr.–Sep.              | Shanxi-                                | Ren et al., 2022      |

|     |      |              |              |              |                        |                                              |                       |
|-----|------|--------------|--------------|--------------|------------------------|----------------------------------------------|-----------------------|
|     |      |              |              |              | 2019–2021              | Shaanxi-<br>Henan                            |                       |
|     |      |              |              |              | May–Oct.<br>2018–2022  | Jiang-Zhe-Hu-<br>Wan<br>(JZHW)               | Li et al., 2024       |
|     |      |              |              |              | Apr.–Sep.<br>2019–2021 | Shanghai-<br>Jiangsu-<br>Zhejiang-<br>Anhui  | Ren et al., 2022      |
| YRD | 1.59 | [0.90, 2.37] | [1.00, 4.00] | [1.72, 2.64] |                        |                                              |                       |
|     |      |              |              |              | Apr.–Oct.<br>2013–2014 |                                              |                       |
|     |      |              |              |              | Apr.–Oct.<br>2015–2016 | YRD                                          | Zhang et al.,<br>2024 |
|     |      |              |              |              | Apr.–Oct.<br>2017–2019 |                                              |                       |
|     |      |              |              |              | May–Oct.<br>2018–2022  | Chuan-Yu<br>(CY)                             | Li et al., 2024       |
|     |      |              |              |              | May–Nov.<br>2016–2018  | Southwest<br>China<br>(SWC)                  | Du et al., 2022       |
| SCB | 3.24 | [1.93, 4.73] | [0.89, 4.30] | [1.70, 2.85] | [2.5, 4.3]             | Sichuan<br>-Chongqing-<br>Guizhou-<br>Yunnan | Ren et al., 2022      |
|     |      |              |              |              | Apr.–Oct.<br>2013–2014 |                                              |                       |
|     |      |              |              |              | Apr.–Oct.<br>2015–2016 | Chuan-Yu<br>(CY)                             | Zhang et al.,<br>2024 |
|     |      |              |              |              | Apr.–Oct.              |                                              |                       |

| 2017–2019 |                  |              |              |              |                |                                                          |                       |
|-----------|------------------|--------------|--------------|--------------|----------------|----------------------------------------------------------|-----------------------|
|           |                  |              |              |              |                | Guangdong-<br>Hong Kong-<br>Macao-<br>Guangxi-<br>Hainan | Li et al., 2024       |
|           |                  |              |              |              |                | South China<br>(SC)                                      | Du et al., 2022       |
| PRD       | 2.62[1.66, 3.70] | [1.04, 3.80] | [2.02, 3.13] |              |                | Guangdong-<br>Hong Kong-<br>Macao-<br>Guangxi-<br>Hainan | Ren et al., 2022      |
|           |                  |              |              |              |                |                                                          |                       |
|           |                  |              |              |              |                | Guangdong                                                | Zhang et al.,<br>2024 |
|           |                  |              |              |              |                |                                                          |                       |
|           |                  |              |              |              |                | China                                                    | Wang et al.,<br>2021  |
|           |                  |              |              |              |                | China                                                    | Ren et al., 2022      |
| China     | 2.02[1.20, 2.97] | [1.65, 4.20] | [2.03, 3.51] | [1.92, 3.77] | Jun.–Aug. 2023 | China                                                    | Fan et al., 2025      |
|           |                  |              |              |              |                | China                                                    | Fan et al., 2025      |
|           |                  |              |              |              |                | China                                                    | Du et al., 2022       |
| ORC       | 2.07[1.17, 3.08] | /            | /            | /            | /              | /                                                        | /                     |

1078 <sup>1</sup> S1 denotes the region-specific thresholds derived in this study. <sup>2</sup> S2 denotes the minimum–maximum threshold  
 1079 ranges compiled from previous studies. <sup>3</sup> S3 denotes the averaged threshold ranges based on the corresponding  
 1080 minimum and maximum values.

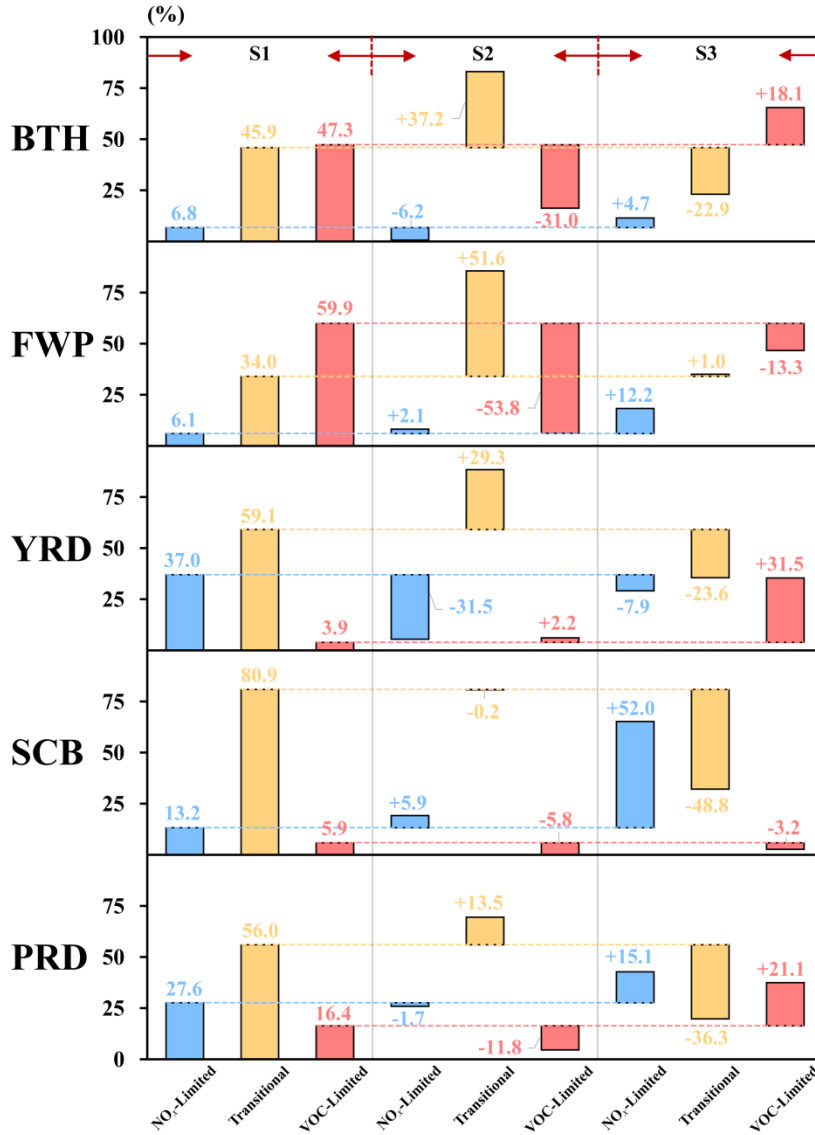

1081  
 1082 **Figure S4. Sensitivity of OFS regime area fractions to different FNR threshold scenarios in the five major**  
 1083 **city clusters during the warm season (April–September) over 2005–2023. S1 denotes the region-specific**  
 1084 **thresholds derived in this study, S2 denotes the minimum–maximum threshold ranges compiled from**  
 1085 **previous studies, and S3 denotes the averaged threshold ranges based on the corresponding minimum and**  
 1086 **maximum values. Bars represent deviations in regime area fractions under S2 and S3 relative to S1.**

1087

1088 4. While the manuscript cites relevant literature, a more explicit comparison with  
 1089 previous findings would better contextualize the novelty and contribution of this work.

1090 For example, how do the identified meteorological drivers and their relative importance  
1091 compare with those reported in other regions with similar climatic conditions or under  
1092 comparable emission-control trajectories?

1093 Response: We fully agree that a more explicit comparison with previous studies  
1094 helps better position the novelty and contribution of this work. In response, we have  
1095 expanded the discussion in the revised manuscript to place our findings in a broader  
1096 context, especially regarding the identified meteorological drivers and their relative  
1097 importance under different regional environments and emission-control backgrounds.

1098 Specifically, we now compare our results with previous studies showing that  
1099 meteorological factors such as temperature, relative humidity, solar radiation, and  
1100 boundary-layer or stability-related variables play important roles in modulating O<sub>3</sub>  
1101 formation and sensitivity in China and other regions (Chen et al., 2020; Liang et al.,  
1102 2024; Xu et al., 2025). In line with earlier studies, our results confirm that  
1103 meteorological influences are regionally heterogeneous and become more evident  
1104 where OFS is more sensitive to humidity, atmospheric stability, or thermal conditions.  
1105 For example, the relatively strong contributions of RH in YRD and SP in FWP are now  
1106 discussed in the context of their regional climatic and atmospheric characteristics.

1107 At the same time, our results differ from many previous studies in that we focus  
1108 not on O<sub>3</sub> concentration itself, but on FNR-derived OFS states, which allows us to show  
1109 how meteorological factors influence the classification and evolution of sensitivity  
1110 regimes, rather than simply O<sub>3</sub> levels. We have clarified it in Lines 626–628:

1111 Our focus is on the FNR-derived OFS, rather than absolute O<sub>3</sub> concentrations,

1112 enabling us to elucidate how meteorology governs the classification and evolution of  
1113 sensitivity regimes.

1114 We have also clarified that, despite the important role of meteorology, our revised  
1115 results show that emission-related variables remain the dominant predictors in most  
1116 regions, while meteorological regulation becomes more pronounced under cleaner-  
1117 emission conditions after 2013. This staged interpretation is now discussed more  
1118 explicitly and compared with previous findings on O<sub>3</sub> responses under changing  
1119 emission-control trajectories. In this way, the revised manuscript better highlights both  
1120 the consistency of our results with the broader literature and the novelty of our  
1121 framework in combining long-term OFS diagnosis with interpretable attribution  
1122 analysis. We have added more relevant discussion in Lines 497–500:

1123 Overall, emission-related variables contribute more than meteorological variables,  
1124 with their total contribution ranging from 50.1% in YRD to 72.2% in PRD. This result  
1125 indicates that OFS classification is primarily constrained by emission-related factors in  
1126 most city clusters. In YRD, meteorological and emission-related variables contribute  
1127 almost equally to OFS classification, accounting for 49.9% and 50.1%, respectively.

1128 And Lines 526–561:

### 1129 **3.4.3 Regional and temporal shifts in OFS-related factor contributions**

1130 To further characterize the temporal evolution of the factors influencing OFS, we  
1131 compared the relative contributions of emission-related and meteorological variables  
1132 between the warm-season periods of 2005–2012 and 2013–2023 (Fig. 8). Overall,  
1133 emission-related variables remained the dominant predictors across most urban clusters

1134 and OFS categories in both periods, with their contributions generally exceeding 50%.  
1135 This suggests that the long-term evolution of OFS in China was primarily governed by  
1136 changes in precursor emissions, although the relative role of meteorology varied by  
1137 region and OFS category.

1138 For the NO<sub>x</sub>-limited regime, the contributions of meteorological and emission-  
1139 related factors in YRD were broadly comparable, whereas emission-related  
1140 contributions in BTH, YRD, and PRD increased slightly after 2013 (+4.6%, +2.2%, and  
1141 +3.5%, respectively). By contrast, meteorological contributions increased moderately  
1142 in FWP and SCB (+4.2% and +4.3%, respectively). In the VOC-limited and transitional  
1143 regimes, emission-related factors also remained dominant overall. However,  
1144 meteorological contributions to the VOC-limited regime increased markedly after 2013  
1145 in BTH, FWP, and PRD, by +8.6%, +6.7%, and +13.0%, respectively. For the  
1146 transitional regime, meteorological contributions increased in all urban clusters except  
1147 YRD, accompanied by corresponding declines in emission-related contributions of  
1148 approximately 2.0%–7.3%.

1149 From an overall perspective (Fig. 8d), the relative contribution of emission-related  
1150 factors decreased slightly after 2013 in BTH, FWP, SCB, and PRD, by about 2.0%–  
1151 5.6%. In YRD, the relative contributions of meteorological and emission-related factors  
1152 remained broadly comparable, although the balance shifted slightly toward emission-  
1153 related influences after 2013. Taken together, these results indicate that, while OFS  
1154 classification remained predominantly emission-driven, the regulatory role of  
1155 meteorology became more pronounced after 2013. This pattern suggests a modest

1156 transition from a regime controlled mainly by emissions toward one jointly modulated  
1157 by emissions and meteorological conditions. Such a shift is consistent with the  
1158 substantial reduction in precursor emissions after 2013 and implies that, under a cleaner  
1159 emission background (Fig. S5), OFS classification may become increasingly sensitive  
1160 to meteorological variability.

1161       These findings are broadly consistent with previous regional studies, while also  
1162 highlighting the strong spatial heterogeneity of OFS influencing factors across China.  
1163 In the Guangdong–Hong Kong–Macao Greater Bay Area, FNR has been reported to be  
1164 mainly influenced by temperature, shortwave radiation, total column water, and surface  
1165 pressure (Chen et al., 2020), whereas in Guangdong Province it is primarily associated  
1166 with surface solar radiation, relative humidity, and temperature (Liang et al., 2024b),  
1167 although emission-related variables were not explicitly considered. By contrast, in the  
1168 Chengdu–Chongqing region, summer OFS has been shown to be mainly driven by CO,  
1169 PM<sub>2.5</sub>, NMVOCs, and NO<sub>x</sub> emissions, with increasing pollution shifting OFS toward  
1170 VOC-limited regimes (Xu et al., 2025). In the North China Plain, the decline in PM<sub>2.5</sub>  
1171 concentrations reduces the loss of HO<sub>2</sub>, enhances their reaction with NO, thereby  
1172 strengthening NO<sub>x</sub> sensitivity and leading to increased O<sub>3</sub> levels (Li et al., 2019).  
1173 Together, these studies support the view that OFS evolution reflects the combined  
1174 influence of emissions and meteorology, but that their relative roles differ substantially  
1175 among regions. Compared with these regional analyses, our results provide a unified  
1176 national-scale framework showing that emission-related factors generally dominate  
1177 OFS classification, while meteorological modulation becomes more evident under a

1178 cleaner emission background.

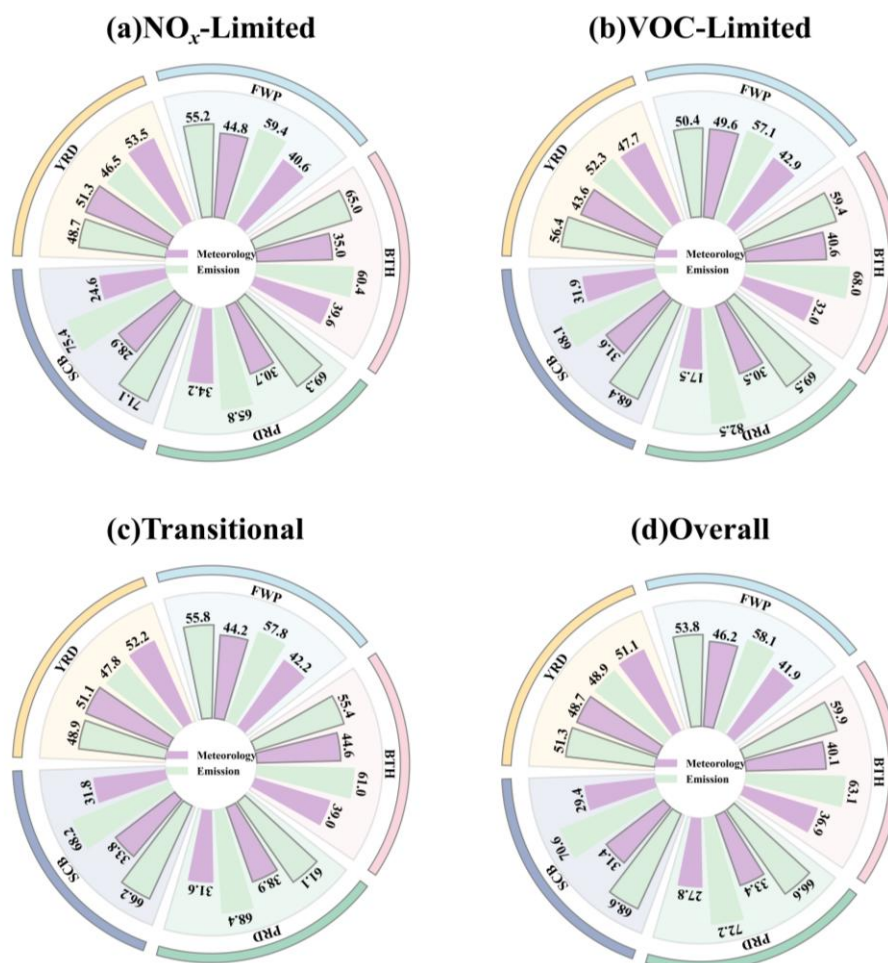

1179

1180 **Figure 8. Relative contributions (%) of emission-related and meteorological factors to OFS classification in**  
1181 **five urban clusters during the warm season (April–September) for the periods of 2005–2012 and 2013–2023,**  
1182 **shown separately for (a)  $\text{NO}_x$ -limited, (b) VOC-limited, (c) transitional, and (d) overall OFS states. Gray**  
1183 **outlined bars denote 2013–2023, whereas bars without outlines denote 2005–2012.**

1184

1185

1186 **Technical comments:**

1187 1. The manuscript describes filtering HCHO pixels with cloud fraction  $> 30\%$  and  
1188 anomalous values ( $> 1.0 \times 10^{17}$  molec  $\text{cm}^{-2}$ ), followed by a  $3 \times 3$  moving average.

1189 However, it does not specify how cloud fraction is obtained (e.g., from an OMI cloud

1190 mask/cloud product) or how “anomalous values” are defined (e.g., statistical outliers  
1191 versus physically implausible retrievals). In addition, resampling HCHO ( $0.1^\circ \times 0.1^\circ$ )  
1192 to the NO<sub>2</sub> grid ( $0.25^\circ \times 0.25^\circ$ ) may introduce spatial-averaging biases; please clarify  
1193 the resampling method (e.g., nearest neighbor, bilinear interpolation, area-weighted  
1194 averaging). These details are important for reproducibility and for interpreting the  
1195 robustness of the derived trends and regimes.

1196       Response: We sincerely thank the reviewer for this careful and constructive  
1197 comment. We agree that these processing details are important for reproducibility and  
1198 for evaluating the robustness of the derived HCHO fields, FNR trends, and OFS  
1199 classification.

1200       In the revised manuscript, we have clarified three aspects of the HCHO  
1201 preprocessing. First, we now explicitly state that the cloud fraction information was  
1202 taken directly from the OMI Level-3 OMHCHOd product, which is generated from the  
1203 OMI Level-2 OMHCHO retrievals after applying standard quality-control screening,  
1204 including the exclusion of pixels with cloud fraction  $> 0.3$ , solar zenith angle  $> 70^\circ$ , or  
1205 those affected by the OMI row anomaly. Second, we clarified that the so-called  
1206 “anomalous values” refer not to statistical outliers identified from our study period, but  
1207 to physically implausible or retrieval-abnormal values outside the retained range of  
1208  $-0.5 \times 10^{16}$  to  $1.0 \times 10^{17}$  molec cm<sup>-2</sup>, following Zhu et al. (2017) and subsequent studies.  
1209 Third, we now explicitly state that the HCHO data were resampled from  $0.1^\circ \times 0.1^\circ$  to  
1210  $0.25^\circ \times 0.25^\circ$  using bilinear interpolation in order to match the NO<sub>2</sub> grid.

1211       We have clarified it in Lines 123–131:

1212 HCHO data were obtained from the Level-3 OMHCHOd product with a spatial  
1213 resolution of  $0.1^\circ \times 0.1^\circ$  (Chance, 2019). This product is generated based on the Level-  
1214 2 OMHCHO retrievals after applying quality control filters to exclude pixels with cloud  
1215 fractions  $> 0.3$ , solar zenith angles  $> 70^\circ$ , or those affected by the OMI row anomaly.  
1216 The HCHO columns were retrieved using the Smithsonian Astrophysical Observatory  
1217 (SAO) algorithm, with typical values ranging from  $4 \times 10^{15}$  to  $4 \times 10^{16}$  molec  $\text{cm}^{-2}$  and  
1218 with a detection limit of approximately  $1.0 \times 10^{16}$  molec  $\text{cm}^{-2}$  (González Abad et al.,  
1219 2015). Following Zhu et al. (2017), only values between  $-0.5 \times 10^{16}$  and  $1.0 \times 10^{17}$   
1220 molec  $\text{cm}^{-2}$  were retained, while values outside this range were treated as outliers and  
1221 removed. To reduce random noise, a  $3 \times 3$  moving average based on the eight-  
1222 neighborhood was applied to the HCHO fields. The smoothed HCHO data were then  
1223 resampled to a  $0.25^\circ \times 0.25^\circ$  grid using bilinear interpolation to match the  $\text{NO}_2$  product,  
1224 following an approach similar to that of Koukouli et al. (2016) for  $\text{SO}_2$  data.

1225

1226 2. Figure 2d shows high HCHO values over the western China, including the Qinghai-  
1227 Tibet Plateau. Is it artificial from satellite retrieval? If not, what's the possible source?  
1228 In addition, the contour color of the small panel is not consistent with the main figure.  
1229 Please clarify.

1230 Response: We sincerely thank the reviewer for this careful and important comment.  
1231 Using the retrieval-uncertainty information provided in the OMI OMHCHOd product,  
1232 we found that western China, particularly the Qinghai–Tibet Plateau, exhibits  
1233 substantially larger HCHO retrieval uncertainties than eastern China. This indicates that

1234 the high HCHO values in this region should be interpreted with caution and may be  
1235 affected, at least in part, by retrieval uncertainty under complex terrain and surface  
1236 conditions. At the same time, we do not exclude the possibility that some of the elevated  
1237 values may also reflect real regional influences, including topographic confinement and  
1238 locally enhanced VOC accumulation in mountainous areas, as suggested by previous  
1239 studies. We have therefore revised the text to present this issue more carefully and to  
1240 avoid over-interpreting the western HCHO enhancement as purely physical or purely  
1241 artificial. We have clarified it in Lines 307–312:

1242 However, they may also be influenced by the relatively large retrieval uncertainties  
1243 in western China, especially over the Qinghai–Tibet Plateau and surrounding areas,  
1244 where complex terrain and surface conditions can affect satellite retrieval accuracy (Fig.  
1245 S2; Xia et al., 2024). Therefore, the elevated HCHO columns in these regions likely  
1246 result from a combination of real atmospheric signals and retrieval uncertainties and  
1247 should be interpreted with caution.

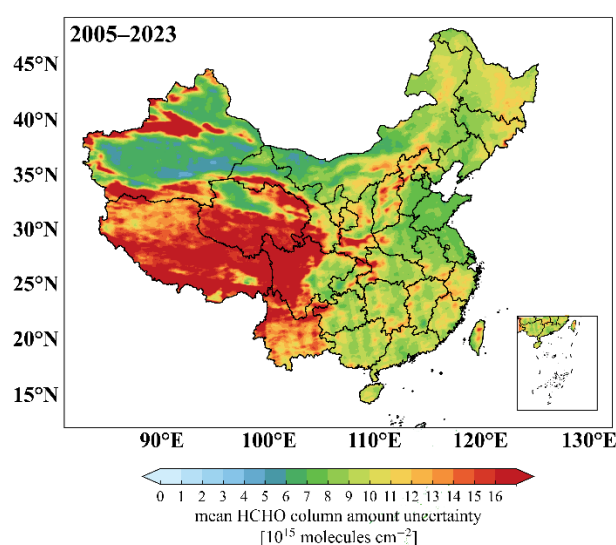

1248  
1249  
1250

**Figure S2. Uncertainty of the mean HCHO column over China during the warm season (April–September) from 2005 to 2023.**

1251

In addition, we have corrected the figure as follows:

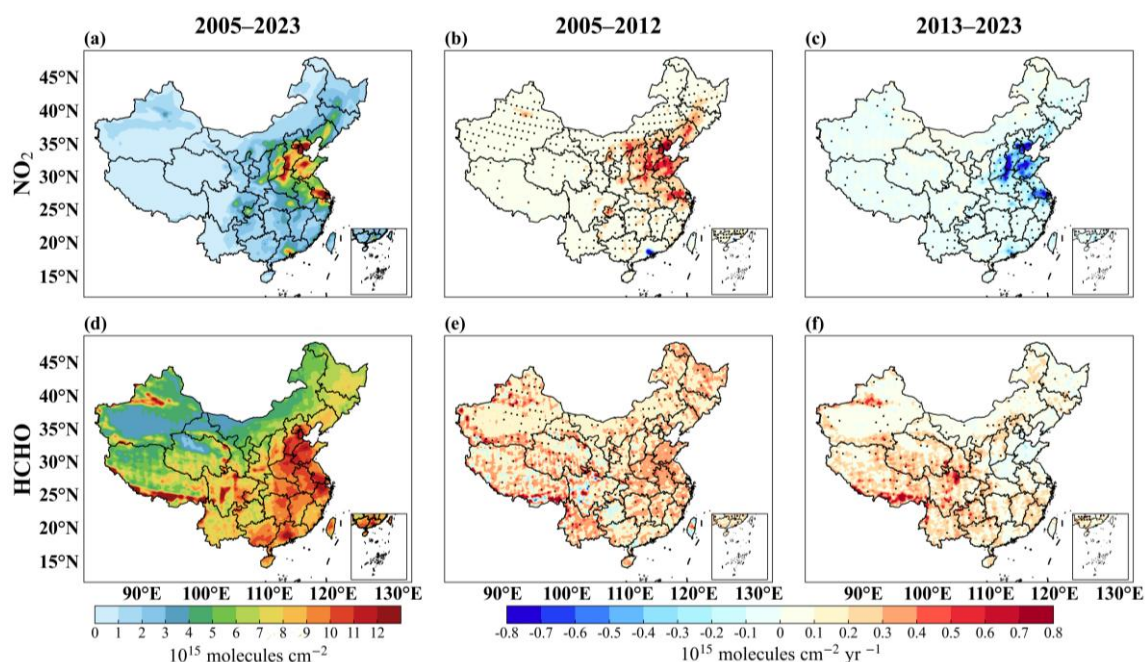

1252

1253

1254

1255

1256

1257

**Figure 2. Spatiotemporal variations of tropospheric NO<sub>2</sub> and HCHO columns over China during the warm season (April–September) from 2005 to 2023. (a, d) Distribution of annual average columns for 2005–2023; spatial distributions of the Sen's slope and Mann-Kendall (MK) test results for annual means during 2005–2012 (b, e) and 2013–2023 (c, f). Black dots in panels (b, c, e, f) mark grids that pass the MK significance test ( $p < 0.05$ ).**

1258

1259

1260

1261

3. The caption of Figure 2 states 2013–2020, whereas the analysis elsewhere emphasizes 2013–2023. Please revise to ensure consistency and confirm that the stated MK–Sen time window matches the actual analysis period.

1262

1263

1264

1265

1266

1267

1268

Response: We sincerely thank the reviewer for carefully pointing out this inconsistency. We confirm that the overall study period in this manuscript is 2005–2023, and that 2013 was treated as the turning point for the subsequent phase-based trend analysis. Accordingly, the MK–Sen trend analysis was conducted separately for the two periods, 2005–2012 and 2013–2023, rather than for 2013–2020. The previous statement in the caption of Fig. 2 was therefore incorrect and has been revised for consistency with the actual analysis as follows:

1269 Figure 2. Spatiotemporal variations of tropospheric NO<sub>2</sub> and HCHO columns over  
1270 China during the warm season (April–September) from 2005 to 2023. (a, d) Distribution  
1271 of annual average columns for 2005–2023; spatial distributions of the Sen’s slope and  
1272 Mann-Kendall (MK) test results for annual means during 2005–2012 (b, e) and 2013–  
1273 2023 (c, f). Black dots in panels (b, c, e, f) mark grids that pass the MK significance  
1274 test ( $p < 0.05$ ).

1275

1276 4. Please standardize the unit notation for NO<sub>2</sub> and HCHO columns (e.g., “molec cm<sup>-2</sup>”  
1277 or “molecules cm<sup>-2</sup>”) throughout the manuscript and clarify at first mention that FNR  
1278 is dimensionless.

1279 Response: We have standardized the units of NO<sub>2</sub> and HCHO column densities  
1280 throughout the manuscript as “molec cm<sup>-2</sup>” to ensure consistency. In addition, we have  
1281 clarified at the first mention of FNR that, because HCHO and NO<sub>2</sub> have the same units,  
1282 FNR is dimensionless. These revisions have been incorporated in the revised  
1283 manuscript (Lines 158–159):

1284 Because the two quantities have the same units, FNR is dimensionless.

1285

1286 5. Providing “last access” information (e.g., “last access: 6 September 2025”) is helpful.  
1287 I suggest also reporting the product version and/or DOI wherever applicable and  
1288 ensuring consistent formatting and completeness across the manuscript (Methods, Data  
1289 availability, and any Supplement).

1290 Response: Modified as suggested.

1291 **Reference**

- 1292 Chen, Y., Yan, H., Yao, Y., Zeng, C., Gao, P., Zhuang, L., Fan, L., and Ye, D.: Relationships of ozone  
1293 formation sensitivity with precursors emissions, meteorology and land use types, in Guangdong-Hong  
1294 Kong-Macao Greater Bay Area, China, *J. Environ. Sci.*, 94, 1–13,  
1295 <https://doi.org/10.1016/j.jes.2020.04.005>, 2020.
- 1296 Chen, N., Yang, Y., Wang, D., You, J., Gao, Y., Zhang, L., Zeng, Z., and Hu, B.: Changing ozone  
1297 sensitivity in Fujian Province, China, during 2012–2021: Importance of controlling VOC emissions,  
1298 *Environ. Pollut.*, 359, 124757, <https://doi.org/10.1016/j.envpol.2024.124757>, 2024.
- 1299 Duncan, B. N., Yoshida, Y., Olson, J. R., Sillman, S., Martin, R. V., Lamsal, L., Hu, Y., Pickering, K.  
1300 E., Retscher, C., Allen, D. J., and Crawford, J. H.: Application of OMI observations to a space-based  
1301 indicator of NO<sub>x</sub> and VOC controls on surface ozone formation, *Atmos. Environ.*, 44, 2213–2223,  
1302 <https://doi.org/10.1016/j.atmosenv.2010.03.010>, 2010.
- 1303 González Abad, G., Liu, X., Chance, K., Wang, H., Kurosu, T. P., and Suleiman, R.: Updated  
1304 Smithsonian Astrophysical Observatory Ozone Monitoring Instrument (SAO OMI) formaldehyde  
1305 retrieval, *Atmos. Meas. Tech.*, 8, 19–32, <https://doi.org/10.5194/amt-8-19-2015>, 2015.
- 1306 Jin, L., Loisy, A., and Brown, N. J.: Role of meteorological processes in ozone responses to emission  
1307 controls in California’s San Joaquin Valley, *J. Geophys. Res. Atmos.*, 118, 8010–8022,  
1308 <https://doi.org/10.1002/jgrd.50559>, 2013.
- 1309 Jin, X., Fiore, A., Boersma, K. F., Smedt, I. D., and Valin, L.: Inferring Changes in Summertime Surface  
1310 Ozone–NO<sub>x</sub>–VOC Chemistry over U.S. Urban Areas from Two Decades of Satellite and Ground-  
1311 Based Observations, *Environ. Sci. Technol.*, 54, 6518–6529, <https://doi.org/10.1021/acs.est.9b07785>,  
1312 2020.
- 1313 Liang, Y. N., Wang, X. H., Qi, S. M., Xu, J. M., and Liu, R.: Sensitivity Analysis of Ozone Generation  
1314 in Guangdong Province Based on OMI Satellite and Ground Observation Data, *Environ. Sci.*, 45,  
1315 6248–6254, <https://link.cnki.net/doi/10.13227/j.hjx.202311261>, 2024 (in Chinese).
- 1316 Lu, X., Hong, J., Zhang, L., Cooper, O. R., Schultz, M. G., Xu, X., Wang, T., Gao, M., Zhao, Y., and  
1317 Zhang, Y.: Severe surface ozone pollution in China: A global perspective, *Environ. Sci. Technol. Lett.*,  
1318 5, 487–494, <https://doi.org/10.1021/acs.estlett.8b00366>, 2018.

1319 Lu, X., Zhang, L., Wang, X., Gao, M., Li, K., Zhang, Y., Yue, X., and Zhang, Y.: Rapid Increases in  
1320 Warm-Season Surface Ozone and Resulting Health Impact in China Since 2013, *Environ. Sci. Technol.*  
1321 *Lett.*, 7, 240–247, <https://doi.org/10.1021/acs.estlett.0c00171>, 2020b.

1322 Lundberg, S. M. and Lee, S.-I.: A unified approach to interpreting model predictions, in: Proceedings of  
1323 the 31st International Conference on Neural Information Processing Systems, Long Beach, California,  
1324 USA2017, <https://doi.org/10.48550/arXiv.1705.07874>, 2017.

1325 Özüpak, Y., Alpsalaz, F., and Aslan, E.: Air quality forecasting using machine learning: Comparative  
1326 analysis and ensemble strategies for enhanced prediction, *Water Air Soil Pollut.*, 236, 464,  
1327 <https://doi.org/10.1007/s11270-025-08122-8>, 2025.

1328 Ozone Pollution Control Committee of Chinese Society of Environmental Sciences: China blue book on  
1329 prevention and control of atmospheric ozone pollution (2023), Science Press, Chinese mainland, 164  
1330 pp., ISBN 9787030781840, 2024.

1331 Ren, J., Guo, F., and Xie, S.: Diagnosing ozone–NO<sub>x</sub>–VOC sensitivity and revealing causes of ozone  
1332 increases in China based on 2013–2021 satellite retrievals, *Atmos. Chem. Phys.*, 22, 15035–15047,  
1333 <https://doi.org/10.5194/acp-22-15035-2022>, 2022.

1334 Sadaiyandi, J., Arumugam, P., Sangaiah, A. K., and Zhang, C.: Stratified sampling-based deep learning  
1335 approach to increase prediction accuracy of unbalanced dataset, *Electronics*, 12, 4423,  
1336 <https://doi.org/10.3390/electronics12214423>, 2023.

1337 Vazquez Santiago, J., Hata, H., Martinez-Noriega, E. J., and Inoue, K.: Ozone trends and their sensitivity  
1338 in global megacities under the warming climate, *Nat. Commun.*, 15, 10236,  
1339 <https://doi.org/10.1038/s41467-024-54490-w>, 2024.

1340 Wang, T., Xue, L., Brimblecombe, P., Lam, Y. F., Li, L., and Zhang, L.: Ozone pollution in China: A  
1341 review of concentrations, meteorological influences, chemical precursors, and effects, *Sci. Total*  
1342 *Environ.*, 575, 1582–1596, <https://doi.org/10.1016/j.scitotenv.2016.10.081>, 2017.

1343 Wang, W., van der A, R., Ding, J., van Weele, M., and Cheng, T.: Spatial and temporal changes of the  
1344 ozone sensitivity in China based on satellite and ground-based observations, *Atmos. Chem. Phys.*, 21,  
1345 7253–7269, <https://doi.org/10.5194/acp-21-7253-2021>, 2021.

1346 Xu, W., Yang, H., He, M., Yang, Z., Zhang, Y., Liu, Z. H., and He, Y. M.: Spatial and Temporal  
1347 Characteristics of Ozone Formation Sensitivity and Its Influencing Factors in Chengdu-Chongqing

1348 Area, Environ. Sci., 46, 736–745, <https://link.cnki.net/doi/10.13227/j.hjlx.202312065>, 2025 (in  
1349 Chinese).

1350 Zhang, C., Xie, Y., Shao, M., and Wang, Q. g.: Application of machine learning to analyze ozone  
1351 sensitivity to influencing factors: A case study in Nanjing, China, Sci. Total Environ., 929, 172544,  
1352 <https://doi.org/10.1016/j.scitotenv.2024.172544>, 2024.

1353 Zhang, S., Yuan, Z., Zheng, Z., and Zhao, K.: Quantitative impacts of dominant large-scale circulation  
1354 systems on surface ozone pollution in China, J. Environ. Sci., 156, 42–55,  
1355 <https://doi.org/10.1016/j.jes.2024.07.015>, 2025.

1356 Zhu, L., Mickley, L. J., Jacob, D. J., Marais, E. A., Sheng, J., Hu, L., Abad, G. G., and Chance, K.: Long-  
1357 term (2005–2014) trends in formaldehyde (HCHO) columns across North America as seen by the OMI  
1358 satellite instrument: Evidence of changing emissions of volatile organic compounds, Geophys. Res.  
1359 Lett., 44, 7079–7086, <https://doi.org/10.1002/2017GL073859>, 2017.
